# Supplementary material for: The Bacterial Intimins and Invasins: A Large and Novel Family of Secreted Proteins
Source: PubMed Central journal article supplement (PMC3008723; doi:10.1371/journal.pone.0014403), 2010-12-22

# CLUSTAL X (1.81.1-alpha) MULTIPLE SEQUENCE ALIGNMENT

File: /Users/saierlab/Desktop/69BBcut.ps

Date: Tue May 12 18:56:54 2009

Page 1 of 6

|       |                                                                           |    |
|-------|---------------------------------------------------------------------------|----|
| Mba1  | -----FGAQQGSKP-----SGGLLVVAFISDPDD                                        | 24 |
| Psp2  | -----LSTGVITNEV-----TGSVLVVKPISDPDS                                       | 24 |
| Ybe1  | WLNNTGTARLQANVDDRG-----DLDGSQLDMLMPFYDTPS                                 | 36 |
| Ype5  | WLNQFGSAKQVNLDEKL-----SLKGSQLDVLLPLTDSPD                                  | 36 |
| Eco14 | WLNQFGTAKTQLSVVSDF-----SLKGSSLDVLLPFYNTPK                                 | 36 |
| Sen3  | WLNQFGTAKVNLGLDKD-----SLDNASLDLPLLYDDKK                                   | 36 |
| Ymo1  | WLGHTGKAQVKLQVDDKN-----DFSGSELHLFVPLYNQPE                                 | 36 |
| Yen2  | WLGHTGQAQVKLQTDKKN-----DFSGSEIDLFIPLYDQPE                                 | 36 |
| Pas1  | -----NDDVMQGSDFSKSGIADMGFAALQPETEKSAAGEVRANLPLSDGKLTSGSIDLFIPLYDGDG       | 61 |
| Yfr1  | WLGQYGNARVQLNSNS-----IGNADVLIPLTETQ-                                      | 30 |
| Yfr5  | WLSQFGHARVQLNSSG-----TGNADILLPLVESQ-                                      | 30 |
| Yps7  | WLSQFGTARVQLNINDDF-----HLDGSAADVLIPLYDNE-                                 | 35 |
| Yfr2  | WLSQFGTARVQMNVDNDF-----KLDGSAADVLIPLYDNO-                                 | 35 |
| Yfr3  | WLSQFGTARVQLNDNNL-----SLKGSADFMLLPLYDDQ-                                  | 35 |
| Yps4  | WLNQFGTARVQLNVSDDF-----KLDNSALDVLVPLKDS-                                  | 35 |
| Yps2  | WLNRFGTAAQVNLNFDKNF-----SLKESLDDWLPWYDSA-                                 | 35 |
| Esa2  | WLSHFGTAAQVTLDDVNG-----NWDNSAFDLFAPLYDNK-                                 | 35 |
| Plu1  | WLSQFGTAKINLVNDRHG-----RLDESSVDLVPFYDDKD                                  | 36 |
| Eco1  | WLOHYGTAEVNLQSGNN-----FDGSSLDLPLPFYDSE-                                   | 33 |
| Pru1  | WLNRFGSSQIHLEADKKF-----SLKNSQIDLLMPWYETE-                                 | 35 |
| Pal3  | WLNRFGSSQIKLEADKKF-----SLKNSQIDLLPLIYETE-                                 | 35 |
| Eta1  | WLNQFGTARVQLDADEHF-----SFKNSQFDLAPLYEQK-                                  | 35 |
| Sg11  | WLNQFGTARQLQDLDNKF-----SLKNSQLDILLIPLYEQP-                                | 35 |
| Eco26 | WFENFGTAHIQLQVDKNE-----SLKNSQLELFPVFEED-                                  | 35 |
| Pmi1  | WLNQFGHARVLSADKNL-----TLKNSSAELLIPLYEQK-                                  | 35 |
| Efe5  | WLNQYGNARIKLVDDSF-----SLKDAEFDLIPWMDTK-                                   | 35 |
| Eco20 | WLGKYGTARVKNLVDDKF-----SLKDSLEMLYPIYDTP-                                  | 35 |
| Eco25 | WLSRFGTARITLGVDEDF-----SLKNSQFDLHPWYETP-                                  | 35 |
| Eco15 | WLNNTGTAXISLGVDEDF-----SLKNSQFDLHPWYDTP-                                  | 35 |
| Eco6  | WLSRFGTARVSLGVDEDF-----SLKSSSFEFLHPWYETP-                                 | 35 |
| Efe2  | WLSQFGTARVTLSADEHF-----TLKGSALDILLIPLYDTP-                                | 35 |
| Efe3  | WLSQNGTVRVTLGLDEDF-----TLKGSADFLLIPWHDTP-                                 | 35 |
| Pal2  | WLSKAGNVKLNIDFDKKF-----SIKNSQFDLIPWYDQE-                                  | 35 |
| Csu1  | -----LRDFFPFGDRE-----YPFERTAIDWLPFYDSE-                                   | 29 |
| Eco3  | WLSPWGNASVDVKVDNEG-----HFTGSRGSWFVPLQDND-                                 | 35 |
| Cko1  | WLSPWGNASVLDLRIDNEG-----SFTGSRGGWFIPWQDNT-                                | 35 |
| Sen1  | WLSANGSASVDVKVDNEG-----HFNRSRGSWFVPLQDKQ-                                 | 35 |
| Eca1  | WLSPWGNASVNRVDDNG-----TFNGSSGSWFIPWQDNN-                                  | 35 |
| Esp2  | WLSPWGNASVDLLVDEEG-----KFNSSGRWFIPWQDNN-                                  | 35 |
| Esa3  | LLSPWGNATVDLLVDEEG-----NFNSSGSLFIPWQDNN-                                  | 35 |
| Kpn1  | WLSPWGNANVDLLVDEEG-----KFTGSKGSWFVPLQDND-                                 | 35 |
| Pan1  | LLSPYGNAEFNLNVDMAG-----NFDGTGGNLFSPHADEN-                                 | 35 |
| Eta2  | LLSPYGRASVSLALSDDG-----SFNGTSAQLLTPWQDNY-                                 | 35 |
| Spr1  | LLSPYGNAKLSLVMSDQG-----DFSGSSGQLFSPLYDYN-                                 | 35 |
| Yin1  | LLGKFGKAQVNLAVDDKG-----SLKSSFSLFSWYEND-                                   | 35 |
| Yin2  | LLGKFGKAQVNLAVDDNG-----SLKSAFSLFSPWYEND-                                  | 35 |
| Yfr4  | LLGKFGQAQVSLAVDDHG-----DFSKSTFSLFIPWYEND-                                 | 35 |
| Ymo2  | LLGRFGQAQVNLVSMNKG-----NLNRSTASLFTPWYDSE-                                 | 35 |
| Eco10 | TLSPYGVKVRSNLSIGQGG-----DLDGSSIDYFVFWYDNO-                                | 35 |
| Eal1  | ALSPYGVKVRSNLSIGQGG-----DLEGSSIDYFIPWYDQ-                                 | 35 |
| Sty4  | MSPYVKIRTSLSVGEQG-----DLDGSSLDYFVFWYDNE-                                  | 34 |
| Eco16 | VLSPYGSVRTLSLIGEGG-----DLDGSTFDYFVFWYDNO-                                 | 35 |
| Ahy1  | SASRYGSEQEVOYWRQQLATQFEENEANAFAASLLGAMGTARTRVTLDDDF-----NMVTAEADLLIPLAEEQ | 67 |
| Sen2  | -----LIFRGGVNLDEGA-----KYRSSEFDMFIPVQETT                                  | 30 |
| Efe4  | -----AQFRGGITLEDAS-----KYRSAEADLLIPLYQST                                  | 30 |
| Bpe1  | GLPFLRNLOGGLSHDFES-----GRTSLQNLNTIDEVYRAG                                 | 35 |
| Bav2  | GLRFLRNLOGDLRHDNDN-----GRTSLELRTIDQVYRKG                                  | 35 |
| Bbr1  | ELPFLRRLQGGVNYDFSN-----KDLSLDLRTIDEVHRGE                                  | 35 |
| Bpa2  | GLPWLRRLLEGVNSYDFSG-----RDVAVDVRTIDALHLDQ                                 | 35 |
| Bav1  | GLPWLRRLDGGRLRYDLDP-----GRLSFLRITIDDLMVSE                                 | 35 |
| Pma1  | -----AQTSVNISGGTESDTSF-----SINSLMKLGEIAKDDQGD                             | 35 |
| Pma3  | -----AQTNFINISGGESDTSF-----SINSLMKLGEIAKDEEGD                             | 35 |
| Pma5  | -----AQTSLNIGGGTESDTSF-----SLNSLMKLGEIAKDDQGD                             | 35 |
| Pma4  | -----AQTTVSINGTSNSETS-----SLDSLMKLREMATDDEGD                              | 35 |
| Ssp1  | -----AQTTLGLDAATSSDLTG-----YLDSEFMRKTLIDGDDNEGD                           | 35 |
| Ssp2  | -----SOTEFGVGFESDADMTY-----YLNSLISLAQLGSDDNGY                             | 35 |
| Plu2  | -----TNAPS-----WVTSWDTVTPCPVYVSEN                                         | 23 |
| Clal  | -----SKSKEELVKNMASSVINTSANEIAKEFIDSLNTSNTDLSFN-----VNERSGFSGNAKALLIPVSEDN | 64 |
| Rba1  | -----LSVGSDDTMGLDKNKSD-----TKTEAMTVYRLKETG                                | 31 |
| ruler | 1.....10.....20.....30.....40.....50.....60.....70.....80                 |    |

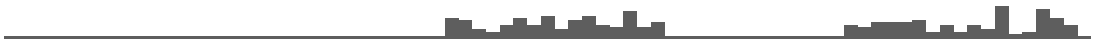

CLUSTAL X (1.81-alpha) MULTIPLE SEQUENCE ALIGNMENT

File: /Users/saierlab/Desktop/69BBcut.ps

Date: Tue May 12 18:56:54 2009

Page 2 of 6

Table of sequence alignment with columns for sequence identifiers (e.g., Mba1, Psp2), amino acid sequences, and residue numbers (90-160). Includes a ruler at the bottom.

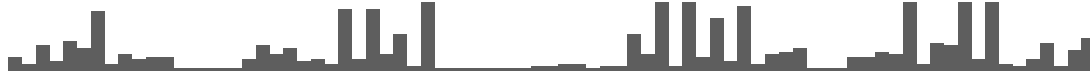

CLUSTAL X (1.81.1-alpha) MULTIPLE SEQUENCE ALIGNMENT

File: /Users/saierlab/Desktop/69BBcut.ps

Date: Tue May 12 18:56:54 2009

Page 3 of 6

|       |                                                                  |      |                  |       |                                      |       |                                   |       |                                    |     |
|-------|------------------------------------------------------------------|------|------------------|-------|--------------------------------------|-------|-----------------------------------|-------|------------------------------------|-----|
|       | * *                                                              |      | * *              |       |                                      |       |                                   |       |                                    |     |
| Mba1  | NANKYWATTKKTKG                                                   | ---- | NGLE             | ----- | ERALDGDIEAGVPLPYMNVATVFKNFQNDSEIS    | 145   |                                   |       |                                    |     |
| Psp2  | LRANQYYGLSGWKSGL                                                 | ---- | NNIN             | ----- | EKALNGSDVELGMPPLPYLPNTNLYRSENWEG-AS  | 145   |                                   |       |                                    |     |
| Ybe1  | LAANGYLRLSDWRDS                                                  | ---- | PDFS-SYS         | ----- | ERPATGFDLRAEALPSLPOLGGKLMVEQYFGNDV   | 155   |                                   |       |                                    |     |
| Ype5  | LAANGYFVSGWKN                                                    | ---- | PDDL-KYD         | ----- | EKVANGFDLRSEAYLPTLPOLGGKLIYEQYFGDEV  | 155   |                                   |       |                                    |     |
| Eco14 | LSANGYKRLSDWFQS                                                  | ---- | PTVT-DVD         | ----- | ERPADGWDIRAEGWLPAYPOLGGKLVYEQYFGNEV  | 156   |                                   |       |                                    |     |
| Sen3  | LSANGYKRLSGWKDS                                                  | ---- | SEYE-DIQ         | ----- | ERVANGYDIRAEGYLPAPPOLGAQLVWEQYFGDDV  | 157   |                                   |       |                                    |     |
| Ymo1  | LSANSYFRLTDWHQNS                                                 | ---- | TRLE-DVD         | ----- | ERAASGYDIRTEAYLPYPOLGGKLMVEQYFGNEV   | 156   |                                   |       |                                    |     |
| Yen2  | LSANSYHRLGGWKN                                                   | ---- | TRLE-DVD         | ----- | ERAANGYDIRTEAYLPHYPOLGGKLMVEQYFGDEV  | 156   |                                   |       |                                    |     |
| Pas1  | LSANGYFGLTDWYSS                                                  | ---- | SALD-GYA         | ----- | ERAANGYDIRAQWFPVYPOLSGKLFPEQYFGDDI   | 181   |                                   |       |                                    |     |
| Yfr1  | FSANGYFRLTDWHQS                                                  | ---- | VLADME-DYN       | ----- | ERPANGFDVRAEALPSYPOLGGRLMVEKYFGKGV   | 152   |                                   |       |                                    |     |
| Yfr5  | FSANGYFRLTDWHQS                                                  | ---- | VLSDME-DYN       | ----- | ERPANGFDVRAAYLPAYPOLGGSLMVEKYFGKGV   | 152   |                                   |       |                                    |     |
| Yps7  | LSANNYFGLTDWHQS                                                  | ---- | RDFI-DYN         | ----- | ERPANGYDLRAEALPSYPOLGGKAMVEKYRGDDV   | 155   |                                   |       |                                    |     |
| Yfr2  | LSANSYIGTSDWHQS                                                  | ---- | RDFA-DYN         | ----- | ERPANGYDVRAEALPSHPOLGGKLMVEKYRGEEV   | 155   |                                   |       |                                    |     |
| Yfr3  | LSANSYLRLTDWHQS                                                  | ---- | RDFA-DYN         | ----- | ERPANGYDLRVEAYLPAYPOLGTNLKVEQYFGNEV  | 155   |                                   |       |                                    |     |
| Yps4  | FSANTYFGLTGWHQS                                                  | ---- | RDFS-SYD         | ----- | ERPADGFDIRTEAYLPAYPOLGGKLMVEKYRGDEV  | 155   |                                   |       |                                    |     |
| Yps2  | LAANGYFRLNGWHSS                                                  | ---- | RDFS-DYK         | ----- | ERPATGGDLRANAYLPALPOLGGKLMVEQYTGERV  | 155   |                                   |       |                                    |     |
| Esa2  | LSANTYIGTSDWHNS                                                  | ---- | GDFD-NYN         | ----- | EKPADGFDVRAEGLPSFPOLGAKLMVEQYFGDNV   | 156   |                                   |       |                                    |     |
| Plu1  | MSANAYFRLSDWHNA                                                  | ---- | RDLV-NYY         | ----- | ERPANGYDLIADMYLPSMPSLGAKIKVEQYFGDNV  | 156   |                                   |       |                                    |     |
| Eco1  | SSVNGYFRMSGWHES                                                  | ---- | YNKK-DYD         | ----- | ERPANGFDIRENGYLPSPALGARLMVEQYFGDNV   | 153   |                                   |       |                                    |     |
| Pru1  | LSANSYHRLSGWRSS                                                  | ---- | RDLA-DHS         | ----- | ARPSNGWDVRAEGLPSYPHIGGKLTVEQYFGDSV   | 155   |                                   |       |                                    |     |
| Pal3  | LSANSYHRLSGWRNS                                                  | ---- | RDLA-DYS         | ----- | TRPANGYDLRAEGLPIYPHIGGKLTVEQYFGEEA   | 155   |                                   |       |                                    |     |
| Eta1  | LSANGYLRLSDWNNS                                                  | ---- | SDFK-DIQ         | ----- | ERPANGYDIRAQWLPSPOLGGKLTVEQYFGGV     | 155   |                                   |       |                                    |     |
| Sgl1  | IGANNYLRLTNWRDS                                                  | ---- | KDFA-DYQ         | ----- | ERPANGYDMSLEGVVPALPOLGGNLYVEQYFGKEV  | 155   |                                   |       |                                    |     |
| Eco26 | LGANSYLRLSNWRNS                                                  | ---- | SNIV-DYE         | ----- | ERPANGYDLNFKSWLPSYPOLGGDIKVEKYFGDDV  | 155   |                                   |       |                                    |     |
| Pmi1  | LSSNHYHRLSSWRAS                                                  | ---- | NNIL-DYS         | ----- | ERPANGYDIRTEGYFPAYPOLGTKLIPEQYFGKEV  | 155   |                                   |       |                                    |     |
| Efe5  | FGANTYFGLSDWKN                                                   | ---- | RDLA-DYL         | ----- | ERPANGYDVSAGWLPAYPOLGASVQPEKYFGKNV   | 156   |                                   |       |                                    |     |
| Eco20 | LSANGYIRASGWKKS                                                  | ---- | PDIE-DYQ         | ----- | ERPANGYDIRAEGYLPAPPOLGASLMVEQYFGDEV  | 156   |                                   |       |                                    |     |
| Eco15 | LSSNGYLRLSNWRSA                                                  | ---- | PELDNDYE         | ----- | ARPANGYDVRAEGLPAWPHLGGKLVYEQYFGDEV   | 156   |                                   |       |                                    |     |
| Eco15 | LSSNAYIGLTGWRSA                                                  | ---- | PELDNDFE         | ----- | ARPANGYDLRAEGLPAWPOLGGKLVYEQYFGDEV   | 156   |                                   |       |                                    |     |
| Eco6  | LSGNGYLRLSNWRSA                                                  | ---- | PELDNDYE         | ----- | ARPANGYDLRAEGLPAWPOLGGKLVYEQYFGDEV   | 156   |                                   |       |                                    |     |
| Efe2  | LGANGYLRLTGWRDA                                                  | ---- | PELDNDFE         | ----- | ARPANGYDVRAEGLPAYPOLGAKLMVEQYFGDEV   | 156   |                                   |       |                                    |     |
| Efe3  | LGANGYLRLSGWRDA                                                  | ---- | PELDNDFE         | ----- | ARPANGYDVRAEGLPAYPOLGATLMVEQYFGDEV   | 156   |                                   |       |                                    |     |
| Pal2  | LNANSYFGLTSWKS                                                   | ---- | SELNDFN          | ----- | AKPAHGWDIQVEGLPNYPHGGNLRVEQYFGDSV    | 156   |                                   |       |                                    |     |
| Csu1  | FSMNGYGLSSPRHS                                                   | ---- | SLQPNYQ          | ----- | ESPAAGLDLFRLHYWLPFFPRLGGKIFVEQYFGKQV | 150   |                                   |       |                                    |     |
| Eco3  | LSANFYQPPAAWHEQ                                                  | ---- | TATQE            | ----- | QRMARGYDLTARMRPFYQHLNTSVSVEQYFGDRV   | 153   |                                   |       |                                    |     |
| Cko1  | LSANYYQPPASWHEQ                                                  | ---- | TTATE            | ----- | QRMARGYDVTQAQMRPFYQHLNTSVSVEQYFGERV  | 153   |                                   |       |                                    |     |
| Sen1  | LSANYYQPPADWQTH                                                  | ---- | TATLE            | ----- | QRMARGYDINAQMRPFYQHLNTSVSVEQYFGDSV   | 153   |                                   |       |                                    |     |
| Eca1  | LSANYYQPPAGWRDD                                                  | ---- | SDVQE            | ----- | QRMARGYDVTAKAWLPWFHHLNTSVSVEQYFGDSV  | 153   |                                   |       |                                    |     |
| Esp2  | LSANYYQPPASWRDS                                                  | ---- | SDVQE            | ----- | QRMARGYDVTAKAWLPWFHHLNTSVSVEQYFGDNV  | 153   |                                   |       |                                    |     |
| Esa3  | LSANYYQPLGGWQHR                                                  | ---- | AGLLE            | ----- | QRMARGYDVTQAQALPFYQHLNTSVSVEQYFGDQV  | 153   |                                   |       |                                    |     |
| Kpn1  | LSANYYHPLGDWQLRD                                                 | ---- | NQOQE            | ----- | QRMAAGYDVTQAQARLPFYQHLNTSVSVEQYFGDSV | 154   |                                   |       |                                    |     |
| Pan1  | FSANYYHPLSGWRNRG                                                 | ---- | SDSQ             | ----- | SRMARGYDITTSQYLPFYQHLNTSVSVEQYFGDEV  | 153   |                                   |       |                                    |     |
| Eta2  | LSANYYHPLSGWRNR                                                  | ---- | NSSQ             | ----- | SRMARGYDITTRGYLPFYHQLGVTLSVEQYLGDR   | 153   |                                   |       |                                    |     |
| Spr1  | FSANYYPLSALAQR                                                   | ---- | DNAQFL           | ----- | SRPASGYDITTSQYLPFYQHLNTSVSVEQYFGDEV  | 155   |                                   |       |                                    |     |
| Yin1  | LATNYYHPLSGWKDSK                                                 | ---- | DFDDYL           | ----- | ERPARGYDVRAQGYLPAYPOLGASVVEQYFGDEV   | 155   |                                   |       |                                    |     |
| Yin2  | LASNYYHPLSGWKDSK                                                 | ---- | DFDDYL           | ----- | ERPARGYDVHAQGYLPAYPOLGASVVEQYFGDEV   | 155   |                                   |       |                                    |     |
| Yfr4  | LATNYYHPLSGWKDSK                                                 | ---- | DFDDYL           | ----- | ERPARGYDVRLQGYLPAYPOLGASVVEQYFGDEV   | 155   |                                   |       |                                    |     |
| Ymo2  | FSANYYHPLSHWKDSE                                                 | ---- | DFDDYL           | ----- | ERPARGYDLRSQGYLPAYPOLGVSAVVEHYFGDEV  | 157   |                                   |       |                                    |     |
| Eco10 | FSGNYHPLSDWKDSE                                                  | ---- | DFDFYE           | ----- | ERPARGYDIRAEALPAYPOLGGKLVFEQYFGNEV   | 155   |                                   |       |                                    |     |
| Eal1  | FSGNYHPLSGWKNSE                                                  | ---- | DFDFYE           | ----- | ERPARGYDIRAEALPAYPOLGGKLVFEQYFGDEV   | 155   |                                   |       |                                    |     |
| Sty4  | FSGNYHPLSDWKDSE                                                  | ---- | DFDFYE           | ----- | ERPARGYDIRMESWLPFYPOLGAKLVFEQYFGDEV  | 154   |                                   |       |                                    |     |
| Eco16 | FSGNYHPLSDWKDSE                                                  | ---- | DFDFYE           | ----- | ERPARGYDVRAEGLPAWPOLGAKLVFEQYFGDEV   | 155   |                                   |       |                                    |     |
| Ahy1  | LGANFYTPLSSWRDSP                                                 | ---- | RFEGME           | ----- | ERAARGYDVRLEAYLPAYPOLNSASLTAQYVGERV  | 188   |                                   |       |                                    |     |
| Sen2  | FSGNYFPLTGWRTS                                                   | ---- | AAHFHD           | ----- | ERPARGYDLRTKGLPDPFWSGELTVEQYFGDKV    | 155   |                                   |       |                                    |     |
| Efe4  | LGNWYFPLSDWKAS                                                   | ---- | KVQPLHD          | ----- | ERPATGYDVRLEKALPSLPNFGAELAPEQYFGDKV  | 155   |                                   |       |                                    |     |
| Bpe1  | LYGNVYAPLSDWKGAK                                                 | ---- | RNNRRE           | ----- | EKPASGMDVGVYRPAFAPGLSLSATFRWNGAEV    | 156   |                                   |       |                                    |     |
| Bav2  | FYGNVYAPMSGWTGAK                                                 | ---- | RDNRRE           | ----- | ERPASGMDLGMKSPGFAPGLSLKANYFRWNGAAV   | 156   |                                   |       |                                    |     |
| Bbr1  | LYGNVYAPMSGWKA                                                   | ---- | RAERRE           | ----- | ERPASGMDVGVRLQPEALPLAIKQGYFRWNGAAV   | 156   |                                   |       |                                    |     |
| Bpa2  | LYGNVYAPLSDWKA                                                   | ---- | RAERRE           | ----- | ERPAAGYDVGFTARPEAVQGLALNAQYFRWNGA    | 156   |                                   |       |                                    |     |
| Bav1  | LYANVYAPLSDWKGAR                                                 | ---- | RDSRRE           | ----- | ERPAAGYDLGGQLS--SDAGLSLQAAVFRWNGAGI  | 154   |                                   |       |                                    |     |
| Pma1  | FRNNWYMAITNEKDVIKGV                                              | ---- | YQ               | ----- | ERVVPGWDLEVGYRLPNNPELAFFYIRGFNWDYK   | 163   |                                   |       |                                    |     |
| Pma3  | FRNNWYISITDEKDVITKGV                                             | ---- | SYK              | ----- | ERVVPGWDVLELGYRLPNNPELAFFVRGFNWDYKHT | 163   |                                   |       |                                    |     |
| Pma5  | LRNNWYMSITNEKDVITKGV                                             | ---- | SYK              | ----- | ERVVPGWDVLELGYRLPNNPELAFFVRGFNWDYKNT | 163   |                                   |       |                                    |     |
| Pma4  | LRNNWYMSITEQKNVTVNGT                                             | ---- | VYT              | ----- | ERVVPGWDVEAGYRFPNHPEMAVFKGFNWDYKNT   | 163   |                                   |       |                                    |     |
| Ssp1  | LRNNWYINGADKNTINNID                                              | ---- | YV               | ----- | ERVVPGWDVEVGYRIPSYPOLAIFVRGFNWDYQDH  | 162   |                                   |       |                                    |     |
| Ssp2  | LRNNWYIAGTGIKRITTSGR                                             | ---- | YDTTSLAAGTYDETTL | ----  | LERVVPGWDVALNRYLPSYPOLSLGIRGFRWDMRK  | 184   |                                   |       |                                    |     |
| Plu2  | LNSNYHRLTDWKL                                                    | ---- | TG               | ----  | VDNNE                                | ----- | EKARGYDVELALAVPYVPSAHRVVKHCWNGIAS | 145   |                                    |     |
| Cla1  | NANVYQRLSSWIDS                                                   | ---- | YV               | ----  | DFDK                                 | ----  | YVQ                               | ----- | ERPANGYDAKIKYAFPSLINVSFAKMGQNYGNKV | 196 |
| Rba1  | FRANAYQAVSKTL                                                    | ---- | TYN              | ----  | GIQ                                  | ----- | ETALDGYDAKLTANLPYFYSS             | ----- | NLYGKLS                            | 143 |
| ruler | .....170.....180.....190.....200.....210.....220.....230.....240 |      |                  |       |                                      |       |                                   |       |                                    |     |

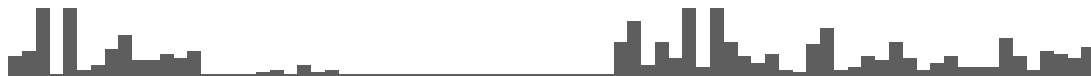

CLUSTAL X (1.81.1-alpha) MULTIPLE SEQUENCE ALIGNMENT

File: /Users/saierlab/Desktop/69BBcut.ps

Date: Tue May 12 18:56:54 2009

Page 4 of 6

Table with 4 columns: Sequence ID (e.g., Mba1, Psp2, Ybe1), Sequence Alignment (e.g., GSKD-----IKGNDLQLRAVPGITGLEIQAGRTFFSDSSGTD--ENYINIFVNTQLFADKPRV-----N), and Position (e.g., 204, 195, 223). The alignment shows conserved regions across various species, with gaps represented by dashes.

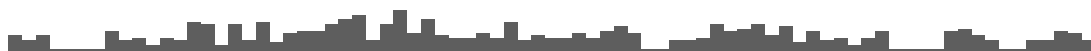

CLUSTAL X (1.81.1-alpha) MULTIPLE SEQUENCE ALIGNMENT

File: /Users/saierlab/Desktop/69BBcut.ps

Date: Tue May 12 18:56:54 2009

Page 5 of 6

|       |                                                                  |               |                 |            |                  |       |       |                      |     |
|-------|------------------------------------------------------------------|---------------|-----------------|------------|------------------|-------|-------|----------------------|-----|
| Mba1  | HQNIISKDAYKLES                                                   | EDRRYKVRRTN   | -----           | -----      | NIVKQIKSLGVKVSGL | 246   |       |                      |     |
| Psp2  | ETGISDTSANLTSVSDQKFAKVR                                          | RQN           | -----           | -----      | LIVKQ-KEMDLTVIGF | 236   |       |                      |     |
| Ybe1  | RRTLQGSNDLVERNNQIVLE                                             | YKKQD         | VINLYV          | SNNVSGRAA  | -----            | ET    | ----- | KQLVSVV-TSKYGLRNIQ   | 283 |
| Ype5  | KRSLMGSRYNLVDNRNNQIVMKYR                                         | RQN           | RVTLLEL         | PARVSGAAR  | -----            | QT    | ----- | MPLVANA-TAQQIDRLE    | 283 |
| Eco14 | QRSLAANRLLELVNRNNDVVLE                                           | YRKQT         | LITLQL          | PPDVYGAEL  | -----            | TT    | ----- | VTLTFQV-NAKYGLSRIE   | 284 |
| Sen3  | RRTLGGSRDLINRNNNIVLE                                             | YRKQD         | LISLKV          | QNKVGTGES  | -----            | ET    | ----- | LPVSVNV-KSKYPLDHIS   | 287 |
| Ymo1  | TRTLAGSRMDLVDNRNNNIVLE                                           | YRKQD         | VVTLNL          | PAKVSQKEK  | -----            | QV    | ----- | LPINVTN-NARHGLDRIE   | 284 |
| Yen2  | TRTLAGSRMDLVDNRNNNIVLE                                           | YRKQD         | VVTLNL          | PEKVSQKEK  | -----            | QV    | ----- | VPINVTN-NARHGLDRIE   | 284 |
| Pas1  | KRTLADNRVHLVERNNNIVLKH                                           | RERA          | QLSLYL          | PTGLSGFGG  | -----            | ER    | ----- | KLINVSF-NGKYRLKHTQ   | 309 |
| Yfr1  | MRSLMGSRVDIVDRNNIVM                                              | QVEKQD        | LIKLTL          | PETLAAYAI  | -----            | TN    | ----- | LSLTGNL-TAKYGAERME   | 284 |
| Yfr5  | MRSLAGSRVDLVDNRNNIVM                                             | QVEKQD        | LINLTL          | PETISAHAL  | -----            | EN    | ----- | VTLTGTN-ASKYGTERTIE  | 284 |
| Yps7  | SRTLAGSRVDLVERNNHIVLD                                            | YQKQD         | LVRLSL          | PDSLADGPF  | -----            | SO    | ----- | LSVTAQV-TATHGLERID   | 283 |
| Yfr2  | TRTLAGSRVDLVERNNNIVLD                                            | YQKQD         | LIRLSL          | PERVEGKAG  | -----            | DI    | ----- | ATVNAQV-TSKYGLERID   | 283 |
| Yfr3  | SRTLAGSRVDLVERNNNIVLE                                            | YQKQD         | LIQVLV          | PNQMTGSAP  | -----            | ET    | ----- | IKVEAQN-TAKYGLKRID   | 283 |
| Yps4  | NRTLAGSRVDLVERNNNIVLD                                            | YQKQD         | LIHLVL          | PDRISGSGG  | -----            | GA    | ----- | ITLTAQV-FAKYGFSRIE   | 283 |
| Yps2  | TRLLAESRYNLVDNRNNNIVLE                                           | YQKQD         | VVRLTSLPATISGL  | PLG        | -----            | QV    | ----- | YQVNAQV-QGASAVREIV   | 284 |
| Esa2  | RRSLAGSRVDLVDNRNNEI                                              | ILQYKKK       | -----           | -----      | -----            | ----- | ----- | -----                | 249 |
| Plu1  | LRSLAGSRVDLVERNNNII                                              | LNVLKQD       | QHPRL           | VPVIEISSY  | -----            | GG    | ----- | EVKPIQI-QSDTFPKNVT   | 284 |
| Eco1  | LRTLGSGRVDLVDNRNNNII                                             | LEKQD         | LISLNI          | PHDINGTER  | -----            | ST    | ----- | OKIQIIV-KSKYGLDRIV   | 281 |
| Pru1  | FRSLMGSRVDLVERNNHIVLE                                            | YKKND         | VIQLNI          | ANSTIGYAG  | -----            | EK    | ----- | IPLSFTV-ASKYGLSHLK   | 283 |
| Pal3  | FRSLMGSRVDLVERNNHILLD                                            | YKND          | TIYLN           | NASITGISG  | -----            | EK    | ----- | IPLKVTI-NSQVGFNRIN   | 283 |
| Eta1  | MRSLAGSRVDLVERNNHIL                                              | QYRKE         | VIRLHT          | VGRVTGYAG  | -----            | ER    | ----- | KSLGVSU-NSSYGLERID   | 283 |
| Sgl1  | MRTLAGSRVDLVDNRNNNIVLE                                           | YRKE          | VIHLYT          | ADHLAGYAG  | -----            | EQ    | ----- | KSLNVSI-NTKYGLERID   | 283 |
| Eco26 | MRKLAGQRVDLVERNNNII                                              | LDYRKE        | IIKIDG          | VDVTSGFSG  | -----            | EK    | ----- | KRLDIRV-NSKYPLDRID   | 283 |
| Pmi1  | IRTLAGSRVDLVDNRNNNII                                             | LDYRKE        | LVFLSM          | VDSINGYAK  | -----            | EE    | ----- | RDLOQVQ-KTKYPLANIE   | 283 |
| Efe5  | MREVQNRVDLVERNNNIVLE                                             | YKKS          | TLRISL          | PDAIEGESG  | -----            | AT    | ----- | IPVTLNVSHASNGIQSVQ   | 285 |
| Eco20 | RRVLAGSRVDLVERNNNIVLE                                            | YRKE          | VIRIAL          | PERTEGKGG  | -----            | QT    | ----- | LSLGLVSKATHGLKNVQ    | 285 |
| Eco25 | RRSLAGSRVDLVDNRNNNIVLE                                           | YRKE          | LVRLTL          | TDPVTGKSG  | -----            | EV    | ----- | KSLVSSL-QTKYALKGN    | 284 |
| Eco15 | RRSLAGSRVDLVDNRNNNIVLE                                           | YRKE          | LIRLSL          | LDPVKGKSG  | -----            | ET    | ----- | KPLVSSL-QTKYALKGN    | 284 |
| Eco6  | RRSLVGRVDLVDNRNNNIVLE                                            | YRKE          | LVRLTL          | TDPVKGKSG  | -----            | EV    | ----- | KSLVSSL-QTKYALKGN    | 284 |
| Efe2  | RRSLGSRHDLVDNRNNNIVLE                                            | YRKE          | LVKLQL          | NDPVTGKGG  | -----            | EQ    | ----- | KPLVASL-QSKYALKTIQ   | 284 |
| Efe3  | RRSLAGSRHDLVDNRNNNIVLE                                           | YRKE          | LVKLQL          | HDPVTGKGG  | -----            | EQ    | ----- | KPLVASL-QSKYALKTLR   | 284 |
| Pal2  | TRRLSGNRVDLVERNNNII                                              | LNQKKT        | VLHLSL          | PSKIQGITG  | -----            | QS    | ----- | VPLVKSF-TSKYPLKHIE   | 284 |
| Csu1  | MRFLNENRYNDFVSRNHN                                               | IVFNSEY       | YDIFVS          | PASISAIEF  | -----            | AS    | ----- | STVSLKCPNTKT-LAHFE   | 278 |
| Eco3  | SQSLRGSRYDNPQRNNLPT                                              | LEYRQK        | TLTVFLATPP      | DLKPG      | -----            | ET    | ----- | VPLKQI-RSRHGIRQLI    | 282 |
| Cko1  | SQSLRGSRYDNPQRNNLPT                                              | MEYRQK        | TLTVFLATPP      | DLQPG      | -----            | ET    | ----- | VPLKQI-RSRHGIRHVT    | 282 |
| Sen1  | SQSLRGSRYDMPQRNALPT                                              | MEYRQK        | TLTVFLATPP      | DLTPG      | -----            | ET    | ----- | VTLKQV-RSVHGIRHLS    | 282 |
| Eca1  | TRSLRGSRYDPAERNSLP                                               | VMFRQK        | TLVSVLATPP      | DLKGG      | -----            | ET    | ----- | VMLKQI-RSTHGIRQLH    | 282 |
| Esp2  | TRSLRGSRYDVPDRISLP                                               | VMFRQK        | TLVSVLATPP      | DLTPG      | -----            | ET    | ----- | VVLKQV-RSTHGIRQLH    | 282 |
| Esa3  | SRSLRGSRYDRVERTNVP                                               | VMFRQK        | TLVSVLATPP      | DLQSG      | -----            | ET    | ----- | VALKQV-RSRHGIRQLS    | 282 |
| Kpn1  | SNSLRGSRYDPERDNL                                                 | PVVEYRQK      | NLTVVFLATPP     | DLQSG      | -----            | ET    | ----- | VQLKQI-HSLHGKALH     | 283 |
| Pan1  | ARSLRGSRYDVTTRSQNP                                               | VMAFRQK       | TLVSVFLATPP     | QLNPG      | -----            | ES    | ----- | VPLKQI-RASHGKALS     | 282 |
| Eta2  | ARSLGSRVDSVNRDNSP                                                | VMAFRQK       | TLVSVFLATPP     | QLOPG      | -----            | ET    | ----- | LRLKQI-ANKNTIKAVS    | 282 |
| Spr1  | AKSLRGSRYDNIERKNVP                                               | VMAFRQK       | TLQVFLATPP      | QRLQPG     | -----            | ET    | ----- | LPLVLEI-KTNKITRVS    | 284 |
| Yin1  | MRSLKGSRYDLVDNRND                                                | IVLEYKEA      | SLALDLAAV       | PMTLLEG    | -----            | DI    | ----- | YLMQPLV-RSKYKIVGVT   | 284 |
| Yin2  | MRSLKGSRYDLVDNRND                                                | IVLEYKEA      | VLSIDLAAV       | PMTLLEG    | -----            | DV    | ----- | YMMQPLV-RSKYKIVGVT   | 284 |
| Yfr4  | MRSLMGSRVDLVDNRND                                                | IVLEYKEA      | GLMLDLAAV       | PATLLEG    | -----            | DV    | ----- | YLMQPLV-NGKYPIASVS   | 285 |
| Ymo2  | LRSLKGSRYDLVDNRND                                                | IVLEYKEQ      | VLEADLAAV       | PDSLMEG    | -----            | ES    | ----- | YILRPLV-KSKYPIIDL    | 286 |
| Eco10 | AHSLMGSRHDFVERNNF                                                | IVLEYREK      | PLDVTLWLKADATNE | HPECVTKDTP | EEAIGLEK         | CKWTN | NALI  | NHNYKIVAAS           | 301 |
| Eal1  | AHSLMGSRHDFVERNNF                                                | IVLEYREK      | HLDVTLWLKADATNE | HPECVTKDTP | EEAVGLEK         | CKWTN | NALI  | NHNYKIVAAS           | 301 |
| Sty4  | QHSLMGSRHDFVDRNNF                                                | IILEYREK      | PLDVTLWLKADATNE | HPECVIEDT  | PEAAVGLEK        | CKWTN | NALI  | NHNYKIVSAS           | 300 |
| Eco16 | KHSLMGSRHDFVERNNF                                                | IVLEYREOD     | PLDVTLWLKADATNE | HPECVTKDTP | ELAVGLEK         | CKWTN | NALI  | NHNYKIVAAS           | 301 |
| Ahy1  | -KSLAGMRHDLIERNNDM                                               | VLEYRDKV      | LLKASL          | NDQVSAVEG  | -----            | QA    | ----- | LTLTINI-QHSRQIASIQ   | 314 |
| Sen2  | PSNTTN-RTAFVDRND                                                 | IVMAYREQA     | -SKIRITAMP      | VSGLSG     | -----            | ----- | ----- | TLVTLMATIDSRVPIEKVE  | 282 |
| Efe4  | ASNTTN-RTAFVDRND                                                 | IVMAYREQA     | -SRIRVYASP      | VNGSQS     | -----            | ----- | ----- | DTVTLSATINSRVPVERIE  | 282 |
| Bpe1  | AFSPDARRHALVERENR                                                | IVLNTRRKEI    | ILPLVSVK        | VTLOADG    | -----            | ----- | ----- | RVTVIGATOPFATVTVR    | 285 |
| Bav2  | VFNLDAAHRNALVERENR                                               | IVLNTRRKEI    | ILPLVSVK        | VTLOADG    | -----            | ----- | ----- | RITLVGOTQQAQATVNT    | 284 |
| Bbr1  | AFDLQARMGEFVERENR                                                | IVLQTRRKHVV   | PLTIARV         | TDPATG     | -----            | ----- | ----- | RITVTGVTEPGAQVSLG    | 283 |
| Bpa2  | PFDRGARLQDFVRRER                                                 | IVLQTRRKHVV   | PLTIARV         | TDPATG     | -----            | ----- | ----- | RITVTGVTEPLADVQSL    | 286 |
| Bav1  | PNLTSRRHQVVERESR                                                 | IVLNTRRKAITL  | PLSIAQL         | RGDPTNG    | -----            | ----- | ----- | AIEVSGQTEAGARIMLT    | 280 |
| Pma1  | KKNMVTQMTQPVKRRK                                                 | VDLLERSAG     | -----           | -----      | GVQNR            | ----- | ----- | AKGV                 | 263 |
| Pma3  | KKNITQMTQPVKRVND                                                 | VLLERAAINSS   | -----           | GAATFTVR   | VS               | ----- | ----- | AQGT                 | 270 |
| Pma5  | KKNMITQMTQPVKRE                                                  | NVLLERYGAN    | -----           | -----      | STFN             | ----- | ----- | AKGS                 | 264 |
| Pma4  | KQNLVTQMTQPVRRR                                                  | EVLLERSTGG    | -----           | -----      | QNR              | ----- | ----- | ARGI                 | 262 |
| Ssp1  | KQNLVTQMTQPVRRR                                                  | EVLLERVKEPTK  | -----           | -----      | NGSITS           | I     | ----- | AQGI                 | 268 |
| Ssp2  | RENLLQMRQPVORRND                                                 | VLLERWPKPKK   | TTGGNGS         | FINQ       | -----            | ----- | ----- | AAGI                 | 296 |
| Plu2  | KPRFSNTPVEFERMD                                                  | DRRFEKIRE     | EQKVISAH        | NNEQPPA    | -----            | ----- | ----- | -----                | 251 |
| Clal  | SNTIEGTRTQFIDRD                                                  | SMVLEYRATPNKY | HISVCGD         | LGNDKHC    | ILLKN            | ----- | ----- | GFDEVVKNTPMRVTPHSCVV | 338 |
| Rba1  | FEPIREKLYRPVOREN                                                 | RIMKKAIKLG    | -----           | -----      | VTVSGV           | ----- | ----- | -----                | 245 |
| ruler | .....330.....340.....350.....360.....370.....380.....390.....400 |               |                 |            |                  |       |       |                      |     |

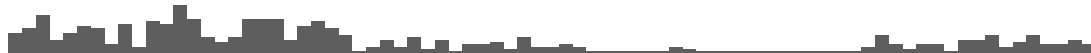

# CLUSTAL X (1.81.1-alpha) MULTIPLE SEQUENCE ALIGNMENT

File: /Users/saierlab/Desktop/69BBcut.ps

Date: Tue May 12 18:56:54 2009

Page 6 of 6

|       |               |                |                |               |       |     |
|-------|---------------|----------------|----------------|---------------|-------|-----|
| Mba1  | -----         | -----          | -----          | -----         | 246   |     |
| Psp2  | -----         | -----          | -----          | -----         | 236   |     |
| Ybe1  | DDQGA         | AAAGGKIIF      | OGPSQFALQLPPO  | -----         | 311   |     |
| Ype5  | WEASA         | LTLAGGKITG     | SGNNWQITLPSY   | -----         | 310   |     |
| Eco14 | DDDAE         | LKQAGGKIIS     | NTGNQITLQIPAW  | -----         | 312   |     |
| Sen3  | WEDDN         | LVKNGGKISE     | NNGSWSVTLPHY   | -----         | 314   |     |
| Ymo1  | WDAAD         | VINAGGNISD     | OGNLAYHITPPY   | -----         | 312   |     |
| Yen2  | WDAAD         | VIKAGGOVIN     | OGNLAYVIAMPY   | -----         | 312   |     |
| Pas1  | WMDGA         | LKARGGRIIA     | LSNNSYVVQPPNY  | -----         | 337   |     |
| Yfr1  | WSAPA         | LMAAGGSIIIP    | LTMSASVTLPPY   | -----         | 312   |     |
| Yfr5  | WSAPV         | LVTGGAITP      | LAMESAVVTLPAY  | -----         | 312   |     |
| Yps7  | WQSAE         | LMAAGGVLKQ     | TSKNGLETLPEY   | -----         | 311   |     |
| Yfr2  | WDSAA         | LIAAGGTLSK     | GSSNSISITLPPY  | -----         | 311   |     |
| Yfr3  | WDIYV         | LVAAGGVVTE     | TSSQNISIKLPPY  | -----         | 311   |     |
| Yps4  | WDATP         | LENAGGSTSP     | LTQSSLSVTLPFY  | -----         | 311   |     |
| Yps2  | WSDAE         | LTAAGGTLTP     | LSTTQFNVLVPPY  | -----         | 312   |     |
| Esa2  | -----         | -----          | -----          | -----         | 249   |     |
| Plu1  | WDIPE         | LKQKNGGMIN     | IESTHGYITQLPEY | -----         | 313   |     |
| Eco1  | WDDSS         | LRSQGGQIQHSGS  | QSAQDYQAILPAY  | -----         | 312   |     |
| Pru1  | WNAET         | LVAAGGHVQE     | NGKYSLVLPAY    | -----         | 310   |     |
| Pal3  | WHDAS         | LVAAGGVIDEK    | NGAYSIILPTY    | -----         | 311   |     |
| Eta1  | WSASS         | LIAAGGKLVREN   | EGSWSVILPEH    | -----         | 311   |     |
| Sg11  | WSAPE         | LIAAGGKIQVES   | IDNYSIVLPDY    | -----         | 311   |     |
| Eco26 | WLANI         | FLANGKINNEG    | LHNYSIILPDY    | -----         | 311   |     |
| Pmi1  | WSASK         | LNAQGGQIKHHG   | GTHYTVILPQY    | -----         | 311   |     |
| Efe5  | WSDSA         | LAAAGGKITGS    | GTSWQITLPAY    | -----         | 312   |     |
| Eco20 | WEAPS         | LIAEGGKITGO    | GSQWQITLPAY    | -----         | 312   |     |
| Eco25 | WEATA         | LEAAGGKVTT     | GKDILVLPAY     | -----         | 311   |     |
| Eco15 | TEAAA         | LEAAGGKVSTS    | GKDIVTLPGY     | -----         | 311   |     |
| Eco6  | TEAAS         | LQSAAGKVAVS    | GKDIQVTPPY     | -----         | 311   |     |
| Efe2  | TDAAT         | LTAAGGVISTA    | DNQVTVLPAY     | -----         | 311   |     |
| Efe3  | AEAAE         | LQSAAGVVNTE    | ANQVTVLPAY     | -----         | 311   |     |
| Pal2  | WQAPE         | FLAVGGSISD     | DQATLTLPSY     | -----         | 311   |     |
| Csu1  | WEAQN         | LIEAGGELITV    | SAGKSNAEYTVKLP | -----         | 310   |     |
| Eco3  | WQGDT         | QILSLTPGAQANS  | AEGWTLIMPDI    | -----         | 311   |     |
| Cko1  | WQGDT         | QALSLTAGAKADS  | AEGWTLIMPDI    | -----         | 311   |     |
| Sen1  | WQGDT         | QALSLTAGTDTR   | NTEGWTLIMPDI   | -----         | 311   |     |
| Eca1  | WQGDT         | QALSLTSPANSTSS | DGWSIIPAW      | -----         | 311   |     |
| Esp2  | WQGDT         | HALSLTSPANANS  | DEGWSVIMPAW    | -----         | 311   |     |
| Esa3  | WQGDT         | QALSLTPPLDSTS  | ADGWSVIMPAW    | -----         | 311   |     |
| Kpn1  | WQGDT         | QALSLTPPVDA    | SSPDGWSIIMPVW  | -----         | 312   |     |
| Pan1  | WQGDT         | QALSLTSPPNNA   | IDGWSVIVPPW    | -----         | 311   |     |
| Eta2  | WQGDT         | QALSLTPPPDN    | SDFDQWSIIPAW   | -----         | 311   |     |
| Spr1  | WQGDT         | QALSLTPSONS    | NDPHGWSLIVPQW  | -----         | 313   |     |
| Yin1  | WNGDT         | VPLSLLATAGATN  | POGWQITLPAW    | -----         | 313   |     |
| Yin2  | WBGDA         | VPLLLVPTAGANN  | POGWQITLPAW    | -----         | 313   |     |
| Yfr4  | WQGDT         | VPLALLATAGVDN  | HPOGWQITLPAW   | -----         | 314   |     |
| Ymo2  | WLGDL         | LPLQLLATAGSH   | NPOGWQITLPAW   | -----         | 315   |     |
| Eco10 | WQAKNNAAS     | WQAKNNAARTL    | VMPVIKENTL     | TEGNNNHNNLVP  | ----- | 346 |
| Eal1  | WQAKN         | NAARTL         | VMPVIKENTL     | TEGNNNRNIVL   | ----- | 337 |
| Sty4  | WQAKN         | NAARTL         | VMPVVKADAL     | TEGNNSWNLVP   | ----- | 336 |
| Eco16 | WQAKN         | NANRTL         | VMPVVKANAL     | TEGNNNRNVL    | ----- | 337 |
| Ahy1  | WLGDLG        | LPGDGL         | LGLSPADTAG     | QDKRALTLPSL   | ----- | 343 |
| Sen2  | WBGDA         | ELIAGLQIQGS    | -----          | LGSGLILPQL    | ----- | 308 |
| Efe4  | WBGDA         | ELIGGLQOQGN    | -----          | VNSGLRPLDL    | ----- | 308 |
| Bpe1  | WPDGM         | TGTATADASGR    | FVTSAGDQPS     | GVVLLARR      | ----- | 320 |
| Bav2  | WPDGS         | SGQSRADAS      | GVYRIESR       | KDQPSGPIRLKAV | ----- | 319 |
| Bbr1  | WPNGE         | VVVQAQD        | SGTYRATSARD    | VMVGGPVRRAT   | ----- | 318 |
| Bpa2  | WPDGT         | ATSVRANAAG     | GFREASSAGDM    | TSGLIRARAT    | ----- | 321 |
| Bav1  | WPDGS         | GNWVRADASGR    | YRARS          | GDMPSGTVRAQAR | ----- | 315 |
| Pma1  | -----         | -----          | -----          | -----         | 263   |     |
| Pma3  | -----         | -----          | -----          | -----         | 270   |     |
| Pma5  | -----         | -----          | -----          | -----         | 264   |     |
| Pma4  | -----         | -----          | -----          | -----         | 262   |     |
| Ssp1  | -----         | -----          | -----          | -----         | 268   |     |
| Ssp2  | -----         | -----          | -----          | -----         | 296   |     |
| Plu2  | -----         | -----          | -----          | -----         | 251   |     |
| Cla1  | WEKGF         | YITDMSGKV      | VQIIR          | SCTPKTDLNAVAG | ----- | 372 |
| Rba1  | -----         | -----          | -----          | -----         | 245   |     |
| ruler | .....410..... | 420.....       | 430.....       | 440.....      |       |     |

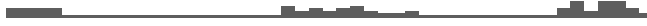

Supplement: pone.0014403.s002.pdf [file pone.0014403.s002.pdf]
