# Supplementary material for: The Bacterial Intimins and Invasins: A Large and Novel Family of Secreted Proteins
Source: PubMed Central journal article supplement (PMC3008723; doi:10.1371/journal.pone.0014403), 2010-12-22
Supplement: pone.0014403.s003.pdf [file pone.0014403.s003.pdf]

Mba1 -----FQAQGGSKP-----

Psp2 -----LSTGVTNEV-----

Ybe1 -----WLNNFGTARLQANVDDR-----

Ype5 -----WFNQFGSAKVQLNLDEKL-----

Eco14 -----WLNQFGTAKTQLSVVSD-----

Sen3 -----WLQQFGTAKVNLGLDKDL-----

Ymo1 -----WLGHIGKAQVKLQVDDKN-----

Yen2 -----WLGHIGQAQVKLQTDKN-----

Pas1 -----NDDVMQGS DISKSGIADMGFAALQPETEKSA GEVRANLPLS

Yfr1 -----WLGQYGNARVQLNSNS-----

Yfr5 -----WLSQFGHARVQLNSSG-----

Yps7 -----WLSQFGTARVQLNINDD-----

Yfr2 -----WLSQFGTARVQMNVNDD-----

Yfr3 -----WLSQFGTARVQLNLDNN-----

Yps4 -----WLNQFGTARVQLNVSD-----

Yps2 -----WLNRFGT AQVNLNFDKN-----

Esa2 -----WLSHFGTAQVTLDVDDNG-----

Plu1 -----WLSQFGTAKINLNVDRG-----

Eco1 -----WLQHYGTAEVNLQSGNN-----

Pru1 -----WFNRFGSSQIHLEADKK-----

Pal3 -----WFNHFSSQIKLEADKK-----

Eta1 -----WLNQFGTARVQLDADEHF-----

Sgl1 -----WLSQFGTARLQLDVDNKF-----

Eco26 -----WFENFGTAHIQLQVDKN-----

Pmi1 -----WLNQFGHARVSLSDKN-----

Efe5 -----WLQQYGNARIKLNVD DSF-----

Eco20 -----WLGKYGTARVKLNVDKDF-----

Eco25 -----WLSRFGTARITLGVDEDF-----

Eco15 -----WLNNFGTAXISLGVDEDF-----

Eco6 -----WLSRWGTARVSLGVDEDF-----

Efe2 -----WLSQWGTARVTL SADEHF-----

Efe3 -----WLSQWGTVRVTLGLDEDF-----

Pal2 -----WLSKAGNVKLNIDFKKF-----

Csu1 -----LRFDFFPGDRE-----

Eco3 -----WLSPWGNASVDVKVDNEG-----

Cko1 -----WLSPWGNASVDLRI DNEG-----

Sen1 -----WLSAWGSASVDVKVDNEG-----

Eca1 -----WLSPWGNASVNV RVDDNG-----

Esp2 -----WLSPWGNASVDLLVDEEG-----

Esa3 -----LLSPWGNATVDLLVDEEG-----

Kpn1 -----WLSPWGNANVDLLVDKEG-----

Pan1 -----LLSPYGNAEFNLNVDMAG-----

Eta2 -----LLSPYGRASVSLALSDDG-----

Spr1 -----LLSPLGNAKLSLVMSDQG-----

Yin1 -----LLGKFGKAQVNLAVDDKG-----

Yin2 -----LLGKFGKAQVNLAVDDNG-----

Yfr4 -----LLGKFGQAQVSI AVDDHG-----

Ymo2 -----LLGRFGQAQVNL SMDNKG-----

Eco10 -----TLSPYGKVRSNLSIGQGG-----

Eal1 -----ALSPYGKVRSNLSIGQGG-----

Sty4 -----MSPYGKIRTSL SVGEGG-----

Eco16 -----VLSPYGSVRTSL SIGEGG-----

Ahy1 SASRYGSEQEVQYWRQQLATQFEEEEANAYAASLLGAMGTARTRVTLDDDF-----

Sen2 -----IIFRGGVNLEDGA-----

Efe4 -----AQFRGGITLEDAS-----

Bpe1 -----GLPFLRNLOGGLSHDFES-----

Bav2 -----GLRFLRNLOGDLRHDFDN-----

Bbr1 -----ELPFLRRLOGGVNYDFSN-----

Bpa2 -----GLPWLRRLLEGVSYDFSG-----

Bav1 -----GLPWLRHLDGGLRYDLDP-----

Pma1 -----AQTSVNISGGTESDTSF-----

Pma3 -----AQTNFNISGGSESDTSF-----

Pma5 -----AQTSLNIGGGTESDTSF-----

Pma4 -----AQTTVSINGTSNSETSF-----

Ssp1 -----AQTTLGLDAATSSDLTG-----

Ssp2 -----SQTEFGVGFESDADMTY-----

Plu2 -----TNAPS-----

Clal -----SKSKEEIVKNMASSYLNTSANELAKEFIDSLNTSINTDFSN-----YN

Rba1 -----LSVGSDTMGLDKNKSD-----

2

3

4

Mba1 -----SGLLLVVAPLSDPDDIFNTYFTQGSVFY-----EDN-RTTLNLGLGYRK-----L

Psp2 -----TGSVLVVKPISDPSDNENIIFTQASLFL-----SDDSRETINLGFGNRK-----L  
 Ybe1 --DLGGSQFDMLMPFYDTPS--QMAFTQFGIRR-----IDKRTTANLIGIGIR-----H  
 Ype5 --SLKGSQLDVLLPLTDSPD--LLTFTQLGGRY-----IDDRVTLNVGLGQR-----H  
 Eco14 --SLKGSULDVLLPFYNTPK--NVLFTQLGMRD-----NDGRFTTNAGLGHR-----Y  
 Sen3 --SLDNASLDLLPLLYDDKK--QNLLFTQWGGRR-----DDRNIIINVGMGYR-----Y  
 Ymo1 --DFSGSELHLFVPLYNQPE--RLAFSQFGFRR-----IDQRNIMNIGLGQR-----H  
 Yen2 --DFSGSEIDLFIPLYDQPE--KLAFSQFGFRR-----IDQRNIMNIGLGQR-----H  
 Pas1 DGKLTSGSIDLFYPLYDGDG--RLFFGQVGARR-----FDGRNIVNLGIGQR-----Y  
 Yfr1 -----IGNADVLIPLTETQ--NNLFGQLGVRY-----NGERTTNNVGLGVR-----S  
 Yfr5 -----TGNADILLPLVESQ--DNLFGQLGVRY-----DGYRTTNNAGIGVR-----Q  
 Yps7 --HLDGSAADVLIPLYDNE--KSILFTQLGARN-----KDSRNTVNMGAGVR-----T  
 Yfr2 --KLDGSAVDVLPVIYDQ--KSILFTQLGARN-----KDNRTVNIAGVR-----T  
 Yfr3 --SLKGSADFMLLPLYDDQ--KSLFQSQGLRN-----HDSRNTINIGAGVR-----T  
 Yps4 --KLDNSALDLLVPLKDSE--SSLLFTQLGVRN-----KDSRNTVNIAGIR-----Q  
 Yps2 --SLKESSLDWLAPWYDSA--SFLFFSQLGIRN-----KDSRNTLNLGVGIR-----T  
 Esa2 --NWDNSAFDFLAPLYDNK--KSVLFTQLGIRA-----PDGRTTGNIGLGVRT-----F  
 Plu1 --RLDESSVDLLVPFYDDKD--HWLVYSQYGYRH-----KDSRDTVNLGIGTR-----L  
 Eco1 ---FDGSSLDLFLPFYDSE--KMLAFQVGARY-----IDSRFTANLGAQR-----F  
 Pru1 --SLKNSQIDLLMPWYETE--DNLIFSQTSLHR-----KEGRIETNLGLGAR-----W  
 Pal3 --SLKNSQIDLLPLYETE--NNLFTQTSLHR-----KEGR IETNLGLGTR-----W  
 Eta1 --SFKNSQFDLLAPLYEQK--DSLIFTQGS LHR-----TDDR TQVNLGFGLR-----Y  
 Sgl1 --SLKNSQLDLLIPLIYEQP--DKLVFTQGS LHR-----TDDR TQTNLGMGMR-----W  
 Eco26 --SLKNSQLELLFPVFEDD--ERLFFSQGGISY-----IDDKFISNIGIGYR-----A  
 Pmi1 --TLKNSSAELLIPLIYEQP--EKLIFAQTNYHR-----KDLRSQFNIGIGYR-----Y  
 Efe5 --SLKDAEFDFLYPWMDTK--DYVLFQS TSLHR-----TDDR NQANIGIGVR-----H  
 Eco20 --SLKDSSLEMLYPIYDTP--TNMLFTQGA IHR-----TDDR TQSNIGFGWR-----H  
 Eco25 --SLKNSQFDLHPWYETP--DNLFFSQHTLHR-----TDER TQINNLGWR-----H

Eco15 --SLKNSQDFLHPWYDTP--DYLLFSQHTLHR-----TDDR**TQINTGLGWR**-----H  
Eco6 --**SLKSSSEFLHPWYETP**--DNLVFSQHTLHR-----TDDRTQTN**HGIGWR**-----Y  
Efe2 --**TLKGSALDLLLLPWYDTP**--ENIIFTQHSIHR-----TDDRNQ**LNTGTGWR**-----H  
Efe3 --**TLKGSADFLLLLPWHDTP**--ENLLFTQHSFHR-----TDDRNQ**LNTGAGWR**-----H  
Pal2 --SIKNSQFDWLIPWYDQE--D**ILLFTQHTLHR**-----YDER**FHTNNGIGLR**-----Y  
Csu1 -YPFERTAIDWLFPFYDSL--**EFLFFSQLGFRHN**----LDRR**DIINLGGGR**-----  
Eco3 --HFTGSRGS**WFVPLQDND**--**RYLTWSQLGLTQ**-----QDDGLVSNVGV**GQRW**-----A  
Cko1 --**SFTGSRGGWF**IPWQDNT--**RYLTWSQLGLTQ**-----QDDGLVSNVGV**GQRW**-----A  
Sen1 --HFNGSRGS**WFIPLQDKQ**--**RYLTWSLLGLTQ**-----QTDGLVSN**IGVQRW**-----V  
Eca1 --TFNG**SSGSWFIPW**NDNN--RYLSWSQLGLTQ-----QTDGLVSNAGV**GQRW**-----V  
Esp2 --KFNG**SSGRWFIPW**QDNN--**RYLSWSQLGLTQ**-----QTDGLVSNAGI**GQRW**-----V  
Esa3 --NFNG**SSGSLFTPW**QDNN--RYLTWSQVGV**SQ**-----Q**NOQLVGNAGIGQRW**-----A  
Kpn1 --**KFTGSKGSWFVPLQDND**--RYLTWNQYSVTR-----RE**HDLVGNIGLGQRW**-----R  
Pan1 --**NFDGTGGNLF**SPLADEN--RYLTFSQLGLHD-----SVEGVVGNAGL**GQRW**-----D  
Eta2 --SFNG**TSAQLLTPW**QDNY--QYLTFSQLGIEQ-----SEYGT**TVGNAGLGQRW**-----I  
Spr1 --DFSGSSGQLFSPLYDVN--GLLTYSQLG**LLQ**-----QTEGSLGNFGL**QRW**-----V  
Yin1 --SLSKSSFSLFSPWYEND--AMVAFSQVGIHG-----QDGR**MIGNLGAGVRF**-----D  
Yin2 --**SLSKSAFSLFSPWYEND**--AMVAFSQVGVHR-----QDNR**MIGNLGAGVRF**-----D  
Yfr4 --DF**SKSTFSLFTPWYEND**--AMVAFSQVGIHD-----QDSRTIGNF**GAGLRW**-----D  
Ymo2 --NLNRSTASLFTPWYDSE--**QYLLFSQINIHH**-----QDNRKIGN**FGLGHR**I-----E  
Eco10 --DLDG**SSIDYFVPWYD**NQ--TTVYFSQFSAQR-----KEDR**TIGNIGLVRY**-----N  
Eal1 --DLEG**SSIDYFIPWYD**DQ--STVYFSQFSAQR-----KEER**TIGNAGIGVRH**-----N  
Sty4 --DLDG**SSLDYFVPWYD**NE--KTLLFSQLSAQR-----KEDR**TIGNFGLGVRQ**-----N  
Eco16 --DLDG**STFDYFVPWYD**NQ--ETLVFSQFSAQR-----KDDR**TIGNIGVGRQ**-----N  
Ahy1 --NMVTA**EADLLPLAEEQ**--QTLLFTQFGLRRN-----GQDR**TIANLGVQRH**-----F  
Sen2 --KYRSSEFDMFIPVQ**ETT**--SLLFGQLGFRDHDSSSF**DGRTFANVGMGRQ**-----E  
Efe4 --KYRS**AEADLLIPLYQST**--**SSILFGQLGLRD**HDNNSFN**GRFFVNTGIGWRQ**-----D

Bpe1 --GR**TSLQLNT**IDEVYRAG--RNTG**LLQLGAHN**-----Q**NDRPTANAGAVYR**-----R  
 Bav2 --GR**TSLELR**TIDQ**VYRKG**--ANTG**LLQLGGHN**-----Q**NNRPTANLGGVYR**-----R  
 Bbr1 --K**DLSDLR**TIDEVHR**GE**--RDR**VLLQLSGHN**-----R**NHRPTVNGGVVLR**-----H  
 Bpa2 --RD**VAVDVRT**IDAL**HLDQ**--DR**ALLQL**GGHN-----Q**HRPTVNAGVVAR**-----S  
 Bav1 --GR**LSFSLR**TIDDL**MVSE**--RR**ALMLQAGLHN**-----Q**NQRPTANTGIVLR**-----Q  
 Pma1 --**SINSLMKL**GELAKDDQ**GLKTLAFS**QARFATAT---NAE**GSTINIGLGR**-----N  
 Pma3 --**SINSLMKL**GELAKDEEG**DLKTLAFS**QARFATAT---NAD**GSTFNLGLGR**-----N  
 Pma5 --**SLNSLMKL**GELAKDDE**GDIKTLAFS**QARLATAT---NAE**GSTTNLGLGR**-----H  
 Pma4 --**SLDLSMKL**RE**MATDDEGDIKTL**LF**SQAKLSKTS**---NSD**GTTANLGLGR**-----H  
 Ssp1 --YLDS**FMRLKTIGYD**NEG**DPMGLMFGQARVTLET**---SAQ-PQ**VNVGLGSR**-----F  
 Ssp2 --YL**NSLISL**AQLGSD**DNGYPLGLL**FAQG-SAKGA---YSG**SAVTNLGLGR**-----R  
 Plu2 --W**VTSWDV**TVPCPVY**SENQADNI**FFEG**GFY**-----Q**DARKTVDGALGRH**-----L  
 Cla1 ER**SFSGNAKALLPI**VSE**DNPKISYFLQSGIGEF**---ANDR**TIGHFGGGIRYYPNATAL**  
 Rba1 ----TK**TEAMTVYRLKETG**--NW**FLFNQTS**AVN-----F**NNRTTINTGFGARH**-----I

. . \*

5 6 7

Mba1 SDNK**MLLTGINAFYDHEFP**---YDHGR**TSIGLEARTV**WEIN**ANKYWAT**TKWKTGK----  
 Psp2 INDDTLL**VGYNLFYDHELD**---YDHQR**ASIGIEAISSV**GSLRAN**QYGLSGWKSGL**----  
 Ybe1 FIDD-W**MVGYNFLDRDIT**---RDHT**RVGAGAEYARDY**L**KLAANGYLRL**SDWRDS--PDF  
 Ype5 **FFAQ-QM**L**GYNFLIDHDAS**---YSHT**RIGVGA**EYGRDF**INLAANGYFGV**SGWKNS--PDL

Eco14 FTDNGWMLGYNVFDVDWR---NTNRRYGIGVEAWRDYLKLSANGYKRLSDWRQS--PTV

Sen3 FADR-WMWGINTFYDRQISD--NAHERLGIGGELGWNYFKLSANGYKRLSGWKDS--SEY

Ymo1 YLSD-WMLGYNVFLDQQISG--NAHRRLGLGGEELARDYVKLSANSYRLGGWKNS--TRL

Yen2 YVSD-WMFGYNIFFDQQVSG--NAHRRVGFGEELARDYIKLSANSYHRLGGWKNS--TRL

Pas1 FQGD-WALGYNTFYDIQISG--NAHQRLGFGLEYWRDYLYLSANGYFGLTDWYSS--SAL

Yfr1 FTDS-WMFGVNTFYDYDLT---GKNRRLGVGGEAWTDNLKFSANGYFRLTDWHQSVLADM

Yfr5 FTEN-WMFGVNSFYDYDLT---GKNRRLGVGAEAWTDNLKFSANGYFRLTDWHQSVLSDM

Yps7 FQGN-WMYGANTFFDNDLT---GKNRRIGVGAEAWTDYLKLSANNYFGITDWHQS--RDF

Yfr2 FQNN-WMYGVNTFFDNDMT---GKNRRVGVGAEAWTDYLKLSANSYIGTSDWHQS--RDF

Yfr3 LQDN-WMYGANVFFDRDIT---GKNRRIGFGAEAWTDYLKLSANSYLRLTDWHQS--RDF

Yps4 YQGD-WMYGANVFFDNDLT---GKNRRVGVGAEVATDYLFKSANTYFGLTGWHQS--RDF

Yps2 LENG-WLYGLNTFYDNDLT---GHNHRLIGLGAEAWTDYLQLAANGYFRLNGWHSS--RDF

Esa2 YVRD-WMFGGNVFFDDDFDFT---GENRRIGFGAEAWTDNYLKLSANTYIGTSQWHNS--GDF

Plu1 FINN-WMYGANTFYDNDLT---GNNSRFLSLGGELWTNYLKMSANAYFRLSDWHNA--RDL

Eco1 FLPE-NMLGYNVFDIDQDFS---GDNTRLGIGGEYWRDYFKSSVNGYFRMSGWHES--YNK

Pru1 YGE-GQMIIGNTFFDYDIS---RKHSRLGLGVEYRRDFLKLSANSYHRLSGWRSS--RDL

Pal3 YGE-NQMIIGNSFFDYDIS---RKHSRLGLGVEYRRDFLKLSANSYHRLSGWRNS--RDL

Eta1 FAP-SYMLGGNIFGDYDLS---RAHSRTGIGMEYWRDFLKLSANGYLRLSDWNNS--SDF

Sgl1 FND-GYMLGGNTFLDYDLS---RDHARMGMGVEYWRDYLKIGANNYLRLTNWRDS--KDF

Eco26 FYD-NWMLGGNSFIDYDLR---KEHSRLGLGIEYWQDNLKLGANSYLRLSNWRNS--SNI

Pmi1 FTE-KFMVGINGFYDHDLT---HHNRLGIGAEIWRDYFKLSSNHYHRLSSWRAS--NNI

Efe5 FTPDNAMLGANIFYDYDLT---RSHSRAGFVGEYWRDYLRFGANTYFGLSDWKNS--RDL

Eco20 FSGNDWMAGVNTFIDHDLS---RSHTRIGVGAEYWRDYLKLSANGYIRASGWKKS--PDI

Eco25 FTP-TWMSGINFFDHDLS---RYHSRAGIGAEYWRDYLKLSANGYLRLTNWRSA--PEL

Eco15 FTS-SWMSGINLFFDHDLS---RYHSRAGLGAEYWRDYLKLSNAYIGLTDWRSA--PEL

Eco6 FTS-SWMSGVNMFIDHDLT---RYHRTGMGVEYWRDYLKLSGNGYLRLSNWRSA--PEL

Efe2 FMP-DYMTGVNLFFDHDLT---RYHSRMGLGGEYWRDNLKLGANGYLRLTGWRDA--PEL

Efe3 FAP-DYMA**GVN**LFDDHDLT---RYHS**R**M**GLGGE**YWRDN**LKLGANGYLRL**SGWRDA--PEL

Pal2 FHE-KST**I**GMNAFIDHDLs---HAHT**RVGLGVE**YWQDY**LKLNANSYFGL**TSWKSA--SEL

Csu1 **F**FRKNWML**G**ANAFCDCLT---GTNT**RLGLGLE**SWTN**F**L**QFSMNGYLGL**SSPRHS---SL

Eco3 RG--**NWLVGYNTFYDNLLD**---ENLQ**RAGFGAEAWGEY**L**RLSANFYQPFAA**WHEQ----T

Cko1 RD--**GWLLGYNTFYDNLLD**---ENLQ**RAGFGAEAWGEY**L**RLSANFYQPFA**SWHEQ----T

Sen1 QN--**GWLLGYNTFYDNLLD**---ENLQ**RAGVGAEAWGEY**L**RLSANFYQPFADWQ**TH----T

Eca1 AG--**NWLLGYNTFYDNLLD**---ENLQ**RAGLGAEAWQNLRLSANFYQPFA**GWRRD----S

Esp2 AG--**KWLLGYNTFYDNLLD**---ENLQ**RAGLGAEAWGENLRLSANFYQPFA**SWRDS----S

Esa3 AG--**HWLLGYNTFYDRLFD**---DDTS**RAGFGAEAWGDY**L**RLSANFYQPLGGWQ**HR----A

Kpn1 VG--**GWLLGYNSFYDKVLS**---ESL**ARGSVGAEAWGEY**L**RLSANFYHPLGDWQ**LRD----N

Pan1 AG--**NWLLGYNSFIDRSF**R---TGLQ**RASVGT**E**AWSNLRF**S**ANFYHPLSGWR**NRG----D

Eta2 AG--**SWRVGYNAFVDGLLG**---SDRQ**RGS**L**GAEAWGEY**L**RLSANFYHPLSGWR**NRS----N

Spr1 **AG--DWLLGYNTVLDSDFE**---RHH**NRAS**L**GAEAWGDF**L**RF**S**ANFYYP**LSA**LAQQR**----D

Yin1 QG--**DWLLGANTFFDQDIS**---RN**HSRLGLGLE**W**WADN**L**KLATN**Y**YHPLSGW**KDSK----D

Yin2 QG--**DWLFGANTFLDQDIS**---RN**HSRLGLGLE**W**WADN**L**KLASN**Y**YHPLSGW**KDSK----D

Yfr4 KG--**NWLLGYNTFLDQDFS**---RN**HSRLGLGAELW**TES**LRLATN**F**YHPLSGW**KDSK----D

Ymo2 **L**PSLNGL**L**GYNVFIDHDFS---RG**HN**R**AGIGAEARADY**L**KFSANFYHPLSH**WKDSP----D

Eco10 FD--**KYLLGGNIFYDYDFT**---RG**HR**L**LGLGAEAWTDY**L**KFSGN**Y**YHPLSDW**KDSE----D

Eal1 FD--**KWLLGGNIFYDYDFT**---RG**HR**L**LGLGTEAWTDY**L**KFSGN**Y**YHPLSGW**KNSE----D

Sty4 **VG--NWLLGGNAFYDYDFT**---RG**HR**L**LGLGTEAWTDY**L**KFSGN**Y**YHPLSDW**KDSE----D

Eco16 IG--**SWLLGGNLFYDYDFT**---RG**HR**L**LGLGSEAWTDY**L**KFSGN**Y**YHPLSDW**KDSK----D

Ahy1 **L**DR--**WMLGYNFLFADYDLT**---NR**H**W**RAGVGAEAWRDY**L**KLGANFY**T**PLSSWR**DSP----R

Sen2 **V**NG--**WLLGVNTFLDADIR**---Y**SHLRGGIGGE**VYKES**LAFSGN**Y**FPLTG**WRTS---AA

Efe4 VGD--**WLLGIN**SFLDADVR---Y**DHLRGS**L**GV**ELFRDS**MSLAGN**W**YFPLSDW**KAS---KV

Bpe1 EVNDAL**M**V**G**ANGFLDYDFG---KQ**H**L**RGS**V**G**LE**VIAPE**F**S**LYGN**VYAP**LSDWKGAK---R

Bav2 DINER**L**M**L**G**A**NAFLDYEFA---KQ**H**L**RGS**L**GVEAIAPE**F**S**FYGN**VYAP**MSGWTGAK---R

Bbr1 AL**NQ**HMA**V**G**A**NAFLDYDFG---KN**H**L**RGS**L**GGEVIAPE**F**T**LYGN**VYAP**MSGWKA**A**K---R



Bpa2 AAGSSLII**LGNAFLDYEVG**---KRHL**RGSLGAEAVAAQFTLYGNVYAPLSG**WKAAK---R  
 Bav1 **QASPLIVGSNAFLDYEVG**---KQHV**RGSLGLEAIA**PHYS**LYANYYAPLSG**WKGAR---R  
 Pma1 RPDDISM**VGANAFWDYRMTDYS**DAHS**RLGLGGEYFWKDFEFRNNWYMAI**TNEKDVIKGV  
 Pma3 RPNDISM**VGANAFWDYRMTDYS**DAHS**RLGLGGEYFWKDFEFRNNWYISI**TDEKDVTIKGV  
 Pma5 RPNDV**SMLGANAFWDYRMTDYS**DAHS**RLGLGGEYLWKDFELRNNWYMSI**TNEKDVTIKGV  
 Pma4 RPNNESM**MGANAFLDYRMTDYS**SHSR**RLGLGGEYLKNGWELRNNWYMSM**TEQKNVTVNGT  
 Ssp1 **RLGDEAIVGLNGF**WDLRTTNYSTAYTR**WGIGAEGFWKSFELRNNWYING**SADKNITINNI  
 Ssp2 **RLRDNAMLGANAFWDYRFTNYSSYSRWGAGAE**LWDD**FKLTNNWYIAG**TGIKRITTSGR  
 Plu2 MSDNKV**MLGANVLYSHEFP**---RNHQ**RISYGAEIRTSVFEINSNYHRLTDW**KLGT---V  
 Cla1 **NNSGNIMLGLNSVYD**HDFS---RGHK**RMSLGAEMVDTLAFNANVYQRL**SSWIDSY--DF  
 Rba1 NDANTVIT**GNIFYDYELQ**---SKHER**VGAGLELLSSI**FEFRANAYQAVSKTLTYN----

\* \* . . \* . \* \* \* \*

8 9

Mba1 -NGLE-----ERALD**GYDIEAGVPLPYMNWATVFVKNFQW**DSEIS  
 Psp2 -NNIN-----EKAL**NGSDVELGMPLPYLPWTNLYYRSFNWEG**-AS  
 Ybe1 S-SYS-----ERPAT**GFDLRAEAYLPSLPQLGGKLMYEQYF**GNDV  
 Ype5 D-KYD-----EKVANG**FDLRSEAYLPTLPQLGGKLIYEQYF**GDEV  
 Eco14 T-DYD-----ERPAD**GDIRAEGWLPAYPQLGGKLVYEQYF**GNEV  
 Sen3 E-DYQ-----ERVANG**YDIRAEGYLPWPQLGAQLVWEQYYGDDV**  
 Ymo1 E-DYD-----ERAAS**GYDIRTEAYLPYYPQLGGKLMYEQYF**GNEV

Yen2 E-DYD-----ERAANGYDIRTEAYLPHYPQLGGKLMYEQYFGDEV  
 Pas1 D-GYA-----ERAANGYDIRAQWFPVYPQLSGKLFQYFGDDI  
 Yfr1 E-DYN-----ERPANGFDVRAEAYLPSYPQLGGRLMYEKYFGKGV  
 Yfr5 E-DYN-----ERPANGFDVRAAAYLPAYPQLGGSLMYEKYFGKGV  
 Yps7 I-DYN-----ERPANGYDLRAEAYLPSYPQLGGKAMYEKYRGDDV  
 Yfr2 A-DYN-----ERPANGYDVRAEAYLPSHPQLGGKLMYEKYRGEEV  
 Yfr3 A-DYN-----ERPANGYDLRVEAYLPAYPQIGTNLKYEQYKNEV  
 Yps4 S-SYD-----ERPADGFDIRTEAYLPAYPQLGGKLMYEKYRGDEV  
 Yps2 S-DYK-----ERPATGGDLRANAYLPALPQLGGKLMYEQYTGERV  
 Esa2 D-NYN-----EKPADGYDVRAEGYLPSPFQLGAKLMYEQYYGDNV  
 Plu1 V-NYY-----ERPANGYDLIADMYLPSMPSLGAKIKYEQYFGDNV  
 Eco1 K-DYD-----ERPANGFDIRFNGYLPSYPALGARLMYEQYYGDNV  
 Pru1 A-DHS-----ARPSNGWDVRAEGWLPSPYPHIGGKLTYEQYYGDSV  
 Pal3 A-DYS-----TRPANGWDLRAEGWLPYYPHIGGKLTYEQFYGEEA  
 Eta1 K-DYQ-----ERPANGWDIRAQAWLPQLGGKLTYEQYYGRGV  
 Sgl1 A-DYQ-----ERPANGWMSLEGWVPALPQLGGNLKYEQYYGKEV  
 Eco26 V-DYE-----ERPANGLDLNIKSWLPSPYQIGGDIKYEKYGGDDV  
 Pmi1 L-DYS-----ERPANGWDIRTEGYFPAYPQLGTKLIFEQYYGKEV  
 Efe5 A-DYL-----ERPANGWDVSAEGWLPAYPQLGASVQFEKYYGKNV  
 Eco20 E-DYQ-----ERPANGWDIRAEGYLPAPWQLGASLMYEQYYGDEV  
 Eco25 DNDYE-----ARPANGWDVRAEGWLPAPWHLGGKLVYEQYYGDEV  
 Eco15 DNDFE-----ARPANGWDLRAEGWLPAPWQLGGKLVYEQYYGDEV  
 Eco6 DNDYE-----ARPANGWDLRAEGWLPAPWQLGGKLVYEQYYGDEV  
 Efe2 DYDYE-----ARPANGWDVRAEGYLPAYPQLGAKLMYEQYYGDEV  
 Efe3 DYDYE-----ARPANGWDVRAEGYLPAYPQLGATLMYEQYYGDEV  
 Pal2 NHDFN-----AKPAHGWDIQVEGWLPNYPHLGGNLRYEQYYGDSV  
 Csu1 QPNYQ-----ESPAHGLDFRLHYWLPFFPRLGGKIFYEQYFGKQV

Eco3 ATQE-----QRMARGYDLTARMRMPFYQHLNNTSVSVEQYFGDRV

Cko1 TALE-----QRMARGYDVTAQMRMPFYQHLNNTSVSVEQYFGERV

Sen1 ATLE-----QRMARGYDINAQMRLPFYQHINTSVSLEQYFGDSV

Eca1 DVQE-----QRMARGYDVTAKAWLPWFHHLNNTSVSFEQYFGDSV

Esp2 DLQE-----QRMARGYDVTAKAWLPYFHHLNNTSVSFEQYFGDNV

Esa3 GLE-----QRMARGYDVTAQAYLPFYQHINTSVSFEQYFGDQV

Kpn1 QTQE-----QRMARGYDVTAQARLPFYQHINTSVSVEQYFGDSV

Pan1 SQQ-----SRMARGYDITTSYLPFYRQLGVSFSYQOYLGEKV

Eta2 SSQ-----MRMARGYDITTRGYLPFYHQLGVTLSEYEQYLGDRV

Spr1 NAQFL-----SRPASGYDITTSYLPFYRQIGGSLSEYEQYWGENV

Yin1 FDDYL-----ERPARGFDVRAQGYLPAYQQLGASVVYEQYYGDEV

Yin2 FDDYL-----ERPARGFDVHAQGYLPAYQQLGASAVYEQYYGDEV

Yfr4 FDDYL-----ERPAKGYDVRLLQGYLPAYPHLGASVVYEQYYGDEV

Ymo2 FDDYL-----ERPAKGYDLRSQGYLPAYPQLGVSAVYEHYFGDEV

Eco10 FDFYE-----ERPARGWDIRAEAWLPAYPQLGGKIVFEQYYGNEV

Eal1 FDFYE-----ERPARGWDIRAEAWLPAYPQLGGKIVFEQYYGDEV

Sty4 FDFYE-----ERPARGWDIRMESWLPFYPLGAKLVYEQYYGDEV

Eco16 FDFYE-----ERPARGWDVRAEGWLPAPWQFGAKLVYEQYYGDEV

Ahy1 FEGME-----ERAARGMDVRLEAYLPAYPQWSASLTAEQYLGERV

Sen2 HEFHD-----ERPAYGFDLRTKGTLPDFPWFSGELTYEQYYGDKV

Efe4 QPLHD-----ERPATGIDVRLKGLPSPLPWFGAELAFEQYFGDKV

Bpe1 NNRRE-----EKPASGMDVGVGYRPAFAPGLSLSATHFRWNGAEV

Bav2 DNRRE-----ERPASGMDLGMKYSFGFAPGLSLKANYFRWNGAAV

Bbr1 AERRE-----ERPASGWDVGVRLQPEALPGLAIKQYFRWSGAAV

Bpa2 AERRE-----ERPASGWDVGFTRPEAVOGLALNAQYFRWRGAQV

Bav1 DSRRE-----ERPASGYDLGGQLS--SDAGLSLQAAFRWHGAGI

Pma1 DYQ-----ERVVPGWDLVGYRLPNNPELAFYIRGFNWDYKYT

Pma3 SYK-----ERVVPGWDVELGYRLPNNPELAFFVRGFNWDYKHT  
Pma5 SYK-----ERVVPGWDVELGYRLPNNPELAFFVRGFNWDYKNT  
Pma4 VYT-----ERVVPGWDVEAGYRFPNHPEMAVFKGFNWDYKNT  
Ssp1 DYV-----ERVVPGWDVEVGYRIPSYQLAIFVRGFNWDYQDH  
Ssp2 AYTDTTSLAAGTYDETTLLGANTFDERVVPWDVALNYRLPSYPQLSLGIRGFRWDYMRK  
Plu2 DNNE-----EKARGGYDVELALAVPYVPSAHFRVKHFCWNGIAS  
Cla1 DKDYVQ-----ERPANGWDAKIKYAFPSLINVSFFAKMGQWYGNKV  
Rba1 --GIQ-----ETALDGYDAKLTANLPYFYSS-----NLYGKLS

\* \*

10 11 12

Mba1 GSKD-----IKGNDLQLRAYIPGITGLEIQAGRTFFSDSSGTD--ENYINIFYNVT  
Psp2 GAAD-----LEGDEISLEAKLTNFN-IEIGK-RS--NDGVTED--EEFLKITYTCC  
Ybe1 GLFG--KDN--RQQNPAAITAGINYTPIPLVTVGIDRKQGSAGNGET--LFNLGVNYEVG  
Ype5 GLFG--VDN--RQKNPLAVTLGVNYTPIPLFTVGVVDHKMGRAGMNDT--RFNLGFNYAFG  
Eco14 ALFG--ESE--RQKNPHAITAGVTWTPFSLLTAGVDYRRGKNGADDT--RLNLGLTYRIG  
Sen3 ALFD--DSEDDRQRNPYAVTAGVNYTPFPLVSIQGLNQMKGKGNHNDT--QIDLAVNWMLG  
Ymo1 ALFG--LNE--RQKNPSALTASVSYTPFPLVNLALEHTIGNSGKKNKT--GVNLAVNYEIN  
Yen2 ALFG--INE--RQKNPSALTAGVSYTPIPLVSLGLDHTIGNGGKKKT--GVNVAVNYEIN  
Pas1 ALLN--HQN--RYKNPYALTMGLEYPPIQLISLGIDRTFSHRGKDDT--KVNLSFNYYQLG  
Yfr1 ALNSGSTSPDDLGDSPSAFTVGLNYTPIPLFTVDVAHKKGQNTNNE--QLGLNFNYRFG

Yfr5 ALNSGSTSPDDLGDSPSAVTLGVNYTPIPLITVDVAHKKGQNTSNEL--QVGLNFNYRFG  
Yps7 ALFG----KDNRQKNP HAITAGVNYTPIPLVTIGAEHRA GKGQNDSD--NINFQQLNYRLG  
Yfr2 ALFG----KDNRQKNP HAVTAGVNYTPIPLLTVGAEHRA GKGSKNDS--SINFQFNYRLG  
Yfr3 ALFG----KDDRQKNP YAFTAGINYTPIPLITIGAEQRAGKGRNDT--NISIQQLNYRLG  
Yps4 ALFG----KDDRQKDP HAVTLGVNYTPVPLVTIGAEHREGKGNNT--SVNVQLNYRMG  
Yps2 ALFG----KDNLQRNP YAVTAGINYTPVPLLTVGV DQRMGKSSKHET--QWNLQMNRYRLG  
Esa2 ALFD----KDLQSNPSA VTVGLNYTPVPLITAGIDY KRGQDSMDEM--KFSLNFHYALD  
Plu1 ALFG----KNKRQKDP YAATIGVNYTPIPLITAGIDY KLGKEGKSDG--IFSFNVNYRFG  
Eco1 ALFN----SDKLQSNP GAATVGVNYTPIPLVTMGIDYRHGTGNENDL--LYSMQFRYQFD  
Pru1 ALFG----TKNLQQNP YSITAGLNYTPIPLVTFNAEHRQ GKASKQDS--RFGQLQNYQFG  
Pal3 ALFG----TKNRQNNP YSITAGINYTPIPLITLNGEHRQ GKASKQDS--RIGLKLSYQFG  
Eta1 ALFG----KENLQQDP RAITAGVNFPPVPLLTLNAEHRQ GASGKNDK--RLGVDFSYQLG  
Sgl1 ALFG----KDNRQKDP HAITVGVNYTPFPLLTFSADQRQ GKAGQNDT--RLGVQLNIQLG  
Eco26 ALFG----ENHRQRNP HSTTLGISYTPFPLMSFKAEHK MGSNNINDS--RIGFEINYQIH  
Pmi1 GLFG----KDKRDKNP HTYTLGINYTPIPLVTLNAERRIGL HDRADN--NLNINLSYRIG  
Efe5 GLFG----SDNLQENP YAVTGEISYTPVPLVKFSAQHRQ QSNTHTD--RFGVEINYRPG  
Eco20 GLFG----KDKRQKDP HAISAEVYTPVPLLTL SAGHKQ GKSGENDT--RFGLEVNYRIG  
Eco25 ALFD----KDDRQSNP HAITAGLNYTPFPLMTFSAEQRQ GKQGENDT--RFAVDFTWQPG  
Eco15 ALFD----KNDRQSNP HAITAGLNYTPFPLLTLSAEQ RQ GKQGENDT--RFAVDLTWQPS  
Eco6 ALFG----KDERQNDP HAITAGLSYTPVPLISFSAEQ RQ GKQGENDT--RIGMELTLQPG  
Efe2 ALFG----RDHRQKDP HAF TAGVSYTPVPLVLSLSAEQ RQ GKGGENDT--RFGLNLSYTPG  
Efe3 ALFG----KDKRQQDP HAF TAGLSYTPVPLISLSAEQ RQ GKGGENDT--RFALNLTYTPG  
Pal2 ALFG----KTKRQKNP NAATIGANWTPFPLFTLNASHKL GSEKQVET--QAKLQFTWTFG  
Csu1 SLFG----RSDLQHDP FVITTGVEFTPFPLLSMEIDHRMSKASRHYT--LFNIRLNRYRFG  
Eco3 DLFN----SGTGYHNP VALSLGLNYTPVPLVTVTAQH KQGESGENQN--NLGLNLNYRFG  
Cko1 DLFD----SGTGYHNP VAVKLGLNYTPVPLVTVTAQH KQGESGVSON--NLGLNLNYRFG  
Sen1 DLFD----SGTGYHNP VALKLGLNYTPVPLLTMTARH KQGESGVSON--NLGLTLNYRFG

Eca1 DLFN----SGTGYHNPMAVNLGLDYTPVPLVTISAARKQGESGVSQN--NLGLKLNRYFG  
 Esp2 DLFR----SGTGYHNPMAVNLGLDYTPVPLLTFSAAHKQGESGVSQN--NLGMKLNRYFG  
 Esa3 ELFD----SGTGYHNPVAVKVGLSYTPVPLVTVSAHHRQGESGVSQN--DLGLKLNRYFG  
 Kpn1 DLFH----SGTGYHNPVAVSVGLNYTPVPLVTVTAKHKQGENGVSQN--NVGLKLNRYFG  
 Pan1 DLFN----SGNRYHNPAAALSLGLSYTPVPLVTISASHKTSSAGESQD--QLGLKLNRYFG  
 Eta2 DLFN----SGNAVADPSAVSLGINYPVPLFTLAASRKEGEGGESQD--QFTLKMNYRIG  
 Spr1 DLFN----SGKKQNDPRAMQLGVNYTPVPLVTVKALHKMGEGGVSD--QVELALNRYLG  
 Yin1 ALFG----KDNLQKDPNAVTVGVDPYTPFPLATLKLHHRGQOGKNN--EVGLRVSYQIG  
 Yin2 ALFG----KDNLQKDPHAVTVGVDPYTPFPLATLKVSHKMGKDGKNN--ELGLQVSYQIG  
 Yfr4 ALFG----KEHLQKDPNAVTLGLDYTPFPLTTLKVSHKEGQOGQKEA--QVDLQMNRYQIG  
 Ymo2 ALFG----KSHRQKDPNAVTLGIDYTPVPLVTLGAKHKYGOQGGKDT--QIDVAFRYQFG  
 Eco10 ALFG----TDSLEKDPFAVTLGVKYQPVPLIVVGTDFKAGTGDNTDL--SVNATLNRYQFG  
 Eal1 ALFG----TDNLEKDPHAVTLGLNYQVPLITVGTDFKTGTGDNTDV--TVNATLNRYQFG  
 Sty4 ALFG----TDNLEKDPHAVTLGLEYPVPLVTVGSDYKAGTGDNDNF--SVKATVNYQIG  
 Eco16 ALFG----TDNLEKDPQALTVGLMYPVPLFTVGSYKSGTGDNSDL--SVNVSLNRYQIG  
 Ahy1 GLLD----ADQLERDPHAITAGLHYNPPLLKMDVEQVEASGRQHD--RFTLGLLEWKLG  
 Sen2 DLLG----NGTLSRNPRAAGAALVWNPVPLEVRAGYRDAGNGGSQA--EGGLRVNYSFG  
 Efe4 DILG----NDSLTRDPAAFTGAITWKPVPLVEIKAGYKDAGSSGSQT--EAGLNLNRYTFG  
 Bpe1 DYFD----NGRTQAGAKGFKVGVVEYRPVSLVSVGLEQTKVIGGGRET--RMQLGLNINLS  
 Bav2 DYFD----NGRTQDRAFGFKYGVQYKPVPLLSLVEQTRVIGGASQT--SVQLGVALNLS  
 Bbr1 DYFD----NGRPQRNARGYKYGVVEYRPVPLVAVGLEQTKVLGGARQT--TVQLGVNLSLG  
 Bpa2 DYFD----DGRYRRNPSPFKYGIERYPVPLIGVVEQARLQSGERQT--SVQLGVRLNLS  
 Bav1 DVFD----SGRAQRNASGFRYGVAYQPGALFNIGLNQTRTLDGQKQT--SVQLNVRINLQ  
 Pma1 QDNS--GLEGAVSWQATPHVGLEAYVSNEISAASTTANTDLPGTDEN--FFGLRMNITGN  
 Pma3 QDNS--GLEGAVSWQATPHVGLEAWVSNEISAASTTVNTSLPGTDET--FFGLRMNITGN  
 Pma5 QDNS--GLEGSVRWQATPHLWWEAYVSNEISAASTTVNTSLPGTDEI--FFGLRVNITGN  
 Pma4 QDNS--GIEGSFNWQATPHVWWEAWVSNEISGAKTVKNSDLPKTDDET--FFGLRFRWTAR

Ssp1 SDNS--GIEGSVNWQATPHANLELWVSN EIPAYPTDSNDTIGNQPGP--YIGARVRLTGR

Ssp2 SDNS--GVEGSVNWQATPH TNL SAWISSEI PAYPAQSNAQLSSGDDV--YVGVRFNVLK

Plu2 NDSN---NPIDDLKGNT FSVSGSVYDGLSVEVGY IDYTSGNADYSKAG GERFLKVSYNF D

Clal GIFG-ANSVDDLEKNP LIYEGGISYSPFPALTF TLSH SRSAESSKKN-TSINANINIPLD

Rba1 NWKD----AASYETEH YEAGINAEI APN LTLRVAAQH KKNSNTEAV---ASINYSVPLG

Mba1 QLFADKPRY-----NHOWISKDAYKLESMEDRR YEKVRRTN-----

Psp2 NNSN-----NEIG ISDTAYNLTSVSDQKFAKVRQN-----

Ybe1 TPWAK----QISP--DAVNARRTLOGS RNDLVERNNQIVLEYKKQD-VINLYV-SNNVSG

Ype5 TPLTH----QLDS--DAVAIKRSLMGSRYNLVDNRNNQIVMKYRKQN-RVTLEL-PARVSG

Eco14 EPLAH----QLDS--SRVGAQRSLAANRLELVNRNNDVVLEYRKQT-LITLQL-PPDVYG

Sen3 SSLKS----QLDS--DAVKARRTLLGSRLDLINRNNNIVLEYRKQD-LISLKV-QNKVTG

Ymo1 TPWQK----QIDP--AAVKATRTRLAGSRMDLVDRNNNIVLEYRKQD-VVTLNL-PAKVSG

Yen2 TPWQQ----QIDP--AAVQTTRTRLAGRRMDLVDRNNNIVLEYRKQD-VVTLNL-PEKVSG

Pas1 VPLSQ----QIDP--TVAPVKRTLADNRYHLVERNNNIVLKH RERA-QLSLYL-PTGLSG

Yfr1 VPWVD----QINK--NAVGLMRSLMGSRDYDVRNRYNIVMQUEYKQD-LIKLTL-PETLAA

Yps7 ETWQS----HIDP--SAVAASRTLAGSRDYDLVERNNHIVLDYQKQN-LVRLSL-PDSLAG

Yfr2 ESWQS----HINP--SAVAATRTRLAGSRDYDLVERNNNIVLDYQKQE-LIRLSL-PERVEG

Yfr3 EPWQS----QIDP--SAVAASRTLAGSRDYDLVERNNNIVLEYQKQD-LIQVLV-PNQMTG

Yps4 QPWND----QIDQ--SAVAANRTLAGSRDYDLVERNNNI VL DYKKQE-LIHLVL-PDRISG  
 Yps2 ESFQS----QLSP--SAVAGTRLLAESRYNLVDRNNNI VLE YQKQO-VVKLTLSPATISG  
 Esa2 SSWQS----QISP--EQVATRRSLAGSRDYDLVDRNNEI ILQYKKK-----  
 Plu1 VPLSE----QLSP--ENVSSLRSLAGSRDYDLVERNNNI ILNYLKKQ-QHFRL-L-VPVIEI  
 Eco1 KPWSQ----QIEP--QYVNELRTLGSRYDLVQRNNNI ILE YKKQD-ILSLNI-PHDING  
 Pru1 KTWKQ----HLDP--GSVTTFRSLMGNRYDFVSRNNHIVLE YKKND-VIQLNI-ANSITG  
 Pal3 KSFQK----HLDP--DAVGEFRSLMGNRYDFVSRNNHILLDYKKN-D-TIYLM-NASITG  
 Eta1 MPWQQ----QINP--QAVATMRSLAGSRDYDLVERNNHILQYRKKE-VIRLHT-VGRVTG  
 Sgl1 TPWOH----QLDT--SAVGAMRTLAGSRDYDLVDRNNNI VLE YRKKE-VIHLYT-ADHLAG  
 Eco26 TPWES----QINP--VLI PAMRKLQRYDLVERNNNI ILDYRKKE-I IKIDG-VDVISG  
 Pmi1 ESLAS----QLNP--DNVKAIRTLAGSRDYDFVNRNNDMILEYKKE-T-LVFLSM-VDSING  
 Efe5 VPLSK----QLDS--DNVAAMREVQNRDYDFVERNNNI VLE YKKKS-TLRISL-PDAIEG  
 Eco20 EPLAK----QLDT--DSIRERRVLAGSRDYDLVERNNNI VLE YRKSE-VIRIAL-PERIEG  
 Eco25 SAMQK----QLDP--NEVDARRSLAGSRDFDLVDRNNNI VLE YRKKE-LVRLTL-TDPVTG  
 Eco6 HSLQK----QLDP--AEVAARRSLVGSRYDLVDRNNNI VLE YRKKE-LVRLTL-TDPLKG  
 Efe2 VSLAR----QLDP--DAVAYRRSLGSRHDLVERNNNI VLE YRKKE-LVKLQL-NDPVTG  
 Efe3 VSLAH----QLDP--DAVAYRRSLGSRHDLVERNNNI VLE YRKKE-LVKLQL-HDPVTG  
 Pal2 KNLAH----HLDP--TKVAETRRLSGNRYDFVERNNNI ILNYQKKT-VLHLSL-PSKIQG  
 Csu1 ESLSS----QLNP--FSVAKMRFLNENRYNFVSRNHVIVFNYS EYT-YDIFVS-PASISA  
 Eco3 VPLKK----QLSA--GEVAESQSLRGSRYDNPQRNNLPTMEYRQRK-TLTVFLATPPWDL  
 Cko1 VPLNK----QLSA--SEVAESQSLRGSRYDNPQRNNLPTMEYRQRK-TLTVFLATPPWDL  
 Sen1 VPLKK----QLAA--SEVAQSQSLRGSRYDMPQRNALPTMEYRQRK-TLTVFLATPPWDL  
 Eca1 VPLAK----QLSA--GEVAATRSLRGSRYDPAERNLPTMEFRQRK-TLSVYLATPPWDL  
 Esp2 VPLKK----QLSS--EEVATTRSLRGSRYDPVDRTSLPVMFRQRK-TLSVYLATPPWDL  
 Esa3 VPLTK----QLSP--DEVAASRSLRGSRYDRVERTNVPMEFRQRK-TLSVFLATPPWDL  
 Kpn1 VPLKQ----QLAA--DEVAISNSLRGSRYDFSPERDNLPTMEYRQRK-NLTVYLATPPWDL  
 Pan1 VALSK----QLDA--NNVAEARSRLRGSRYDTVTRSQNPVMEYRQRK-TLSVFLATPPWDL



Eta2 VPLRQ----QLSS--DNVAEARSLGSRYSVNRDNSPVMAFRQLK-TLSVFLATPPWQL  
Spr1 VPLVK----QISP--EYVAQAKSLRGSRYDNIERKNVPVMAFKQRK-TLQVFLATPPWRL  
Yin1 TPLDK----QLDP--ANVAAMRSLKGSRYDLVDRNNDIVLEYKEKA-SLALDLAAVPMTL  
Yin2 TALEK----QLDP--GNVAAMRSLKGSRYDLVDRNYDIVLEYKEKA-VLSLDLAAVPMTL  
Yfr4 TALS K----QLDP--DNVAAMRSLMGSRYDRVDRNYDIVLEYKEKAGLLMLDLAAVPATL  
Eco10 VPLKD----QLDP--DKVSAHSLMGSRHDFVERNNFIVLEYKEKD-PLYVTLWLKADV T  
Eal1 TPLKD----QLDP--ENVKIAHSLMGSRHDFVERNNFIVLEYREKD-HLDVTLWLKADAT  
Sty4 TPLAA----QLDP--ENVKIQHSLMGSRTDFVDRNFIILEYREKD-PLDVTLWLKADAT  
Eco16 MPLKD----QLDP--DNVKAKHSLMGSRHDFVERNNFIVLEYREQD-PLDVTLWLKADTA  
Ahy1 ATLWD----MLNP--SSVD--KSLAGMRHDLIERNNDMVLEYRDKV-LLKASL-NDQYSA  
Sen2 TPLHE----QLDY--RNVGAPSNTTN-RRAFVDRNYDIVMAYREQA--SKIRITAMPVSG  
Efe4 VPLRA----QLDP--SQVRPASNTTN-RTAFVDRNYNIVMEYREQA--SRIRVYASPVNG  
Bpe1 EPLSK----QLRR-DASGTFAFSPDARRHALVERENRIVLNTRRKEIILPLVSVKYSTLQ  
Bbr1 EPLSR----QLR---HQSGFAFDLQARMGEFVERENRIVLQTRRKHVVLPLTIARVDTDP  
Bpa2 EPLSR----QLRRGAQDTAPPFDRGARLQDFVRRENRIVLDTRRKKIVLALRIAEVRTDP  
Bav1 EPPSR----QLRR----ESQPFNLTSRRHQWVERESRIVLNTRRKAITLPLSIAQLRGDP  
Pma1 PVKFEK-----SNYKKNMVTQMTQPVKRYDVLLERSAG-----GVFQON  
Pma3 PIKFEK-----SNYKKNIIITQMTQPVKRVNDVLLERAAINSS-----GAATFTV  
Pma5 PVTFGK-----KDYKKNMITQMTQPVKREYNVLLERYGAN-----STFTN  
Pma4 PVKFAK-----KNLKQNLVTQMTQPVRRRYEVLLERSTGG-----FQON  
Ssp1 PVVFTK-----SNTKQNLLTQMTQPVRRRYEVLLERVKPTK-----GENGSIT  
Ssp2 PVTYKTG-----SNRIRENLLTQMRQPVQRRNDVLLERWPKPKQKKTIGGVNGSFIN  
Plu2 IFGTH-----VNKATKPRFSNTPYEFERMDDRRFEKIRFEQKVISAHNNEQPPA-  
Cla1 EKAMK---LAFEP--KLAGISNTIEGTRTQFIDRDYSMVLEYRATPNKYHISYCGDLGND  
Rba1 GANQP---AKVKQDGDWSTKFEPIREKLYRVPQRENRI MKKAIKLG-----VTVSG

Mba1 -----NIVKQIKSLGVKVSIGI-----

Psp2 -----LIVKQ-KEMDLTVIGF-----

Ybe1 RAA-----ET-----KQLVSV-TSKYGLRNIQFDQGA-----

Ype5 AAR-----QT-----MPLVANA-TAQOGIDRLEWEASA-----

Eco14 AEL-----TT-----VTLTPQV-NAKYGLSRIELDDAE-----

Sen3 TES-----ET-----LPVSVNV-KSKYPLDHISWEDDN-----

Ymo1 KEK-----QV-----LPINYTF-NARHGLDRIEWDAAD-----

Yen2 KEK-----QV-----VPINYTF-NARHGLDRIEWDAAD-----

Pas1 FGG-----ER-----KLINFSF-NGKYRLKHIQWNDGA-----

Yfr1 YAI-----TN-----LSLTGNI-TAKYGAERMEWSAPA-----

Yfr5 HAL-----EN-----VTLTGTV-ASKYGTERIEWSAPV-----

Yps7 DPF-----SQ-----LSVTAQV-TATHGLERIDWQSAE-----

Yfr2 KAG-----DI-----ATVNAQV-TSKYGLERIDWDSAA-----

Yfr3 SAF-----EI-----IKVEAQV-TAKYGLKRIDWDTAV-----

Yps4 SGG-----GA-----ITLTAQV-RAKYGFSRIEWDATP-----

Yps2 LPG-----QV-----YQVNAQV-QGASAVREIVWSDAE-----

Esa2 -----

Plu1 SSY-----GG-----EVKPIQI-QSDTPFKNVTWDIPE-----

Eco1 TER-----ST-----QKIQLIV-KSKYGLDRIVWDDSS-----

Pru1 YAG-----EK-----IPLSFTV-ASKYGLSHLKWNAET-----

Pal3 ISG-----EK-----IPLKYTI-NSOYGFNRINWHADS-----  
 Eta1 YAG-----ER-----KSLGVSV-NSSYGLERIDWSASS-----  
 Sgl1 YAG-----EQ-----KSLNVTI-NTKYGLERIDWSAPE-----  
 Eco26 FSG-----EK-----KRLDIRV-NSKYPVDRIDWLANT-----  
 Pmi1 YAK-----EE-----RDLQVQV-KTKYPLANIEWSASK-----  
 Efe5 ESG-----AT-----IPVTLNVSHASNGIQSVQWSDSA-----  
 Eco20 KGG-----QT-----LSLGLVSKATHGLKNVQWEAPS-----  
 Eco25 KSG-----EV-----KSLVSSL-QTKYALKGYNVEATA-----  
 Eco15 KSG-----EI-----KPLVSSL-QTKYALKGYNIEAAA-----  
 Eco6 KPG-----EV-----KSLVSSL-QTKYALKGYDIEAAS-----  
 Efe2 KGG-----EQ-----KPLVASL-QSKYALKTLQTDAA-----  
 Efe3 KGG-----EQ-----KPLVASL-QSKYALKTLRAEAA-----  
 Pal2 ITG-----QS-----VPLVKSF-TSKYPLKHIEWQAPE-----  
 Csu1 IEF-----AS-----STVSLKCPNTKT-LAHFEWEAQN-----  
 Eco3 KPG-----ET-----VPLKLQI-RSRYGIRQLIWQGD-----QIL  
 Cko1 QPG-----ET-----VPLKVQI-RSRHGVRHVTWQGD-----QAL  
 Sen1 TPG-----ET-----VTLKLQV-RSVHGIRHLSWQGD-----QAL  
 Eca1 KGG-----ET-----VMLKLQI-RSTHGIRQLHWQGD-----QAL  
 Esp2 TPG-----ET-----VVLKMQV-RSTHGVRQLHWQGD-----HAL  
 Esa3 SAG-----ET-----VALKLQV-RSRHGIRQLSWQGD-----QAL  
 Kpn1 QSG-----ET-----VQLKLQI-HSLHGKALHWQGD-----QAL  
 Pan1 NPG-----ES-----VPLKLQL-RASHSIKALSWQGD-----QAL  
 Eta2 QPG-----ET-----LRLKLQI-ANKNTIKAVSWQGD-----QAL  
 Spr1 QPG-----ET-----LPLVLEI-KTTNKITRVSWQGD-----QAL  
 Yin1 LEG-----DI-----YLMQPLV-RSKYKIVGVTWNGDT-----VPL  
 Yin2 LEG-----DV-----YMMQPLV-RSKYRITSVSWHGDA-----VPL  
 Yfr4 LEG-----DV-----YLMQPLV-NGKYPIASVSWQGD-----VPL

Ymo2 MEG-----ES-----YILRPLV-KSKYPIIDLWLGLD-----LPL  
 Eco10 NEHPECVIKDTPEEAIGLEKCKWTINALI-NHHYKI VAASWQAKNNAASWQAKNNAARTL  
 Eal1 NEHPECVIKDTPEEAIVGLEKCKWTVNALI-NHHYKI VAASWQAKN-----NAARTL  
 Sty4 NEHPECVIEDTPEAAVGLEKCKWTVNALI-NHHYKI ISASWQAKN-----NAARTL  
 Eco16 NEHPECIVKDTPELAVGLEKCKWTINALI-NHHYKI VAASWQAKN-----NANRTL  
 Ahy1 VEG-----QA-----LTLTLNI-QHSRQIASIQWLGDLG-----  
 Sen2 LSG-----TLVTLMATIDSRYPVIEKVE WSGDA-----  
 Efe4 QSG-----DTVTLSATINSRYPVERIE W TGDA-----  
 Bpe1 ADG-----RVTVIGATQPFATVTVRMPDGM-----TG  
 Bav2 VSG-----RITLVGQTQAQATVNWTL PDGS-----SG  
 Bbr1 ATG-----RITVTGVTEPGAQVSLGLPNGE-----VV  
 Bpa2 ATG-----RITVYGVTE PLADVQLWL PDGT-----AT  
 Bav1 TNG-----AIEVSGQTEAGARIMLTFPDGS-----GN  
 Pma1 R-----AKGV-----  
 Pma3 RVS-----AQGT-----  
 Pma5 R-----AKGS-----  
 Pma4 R-----ARGI-----  
 Ssp1 S-I-----AQGI-----  
 Ssp2 Q-----AAGI-----  
 Plu2 -----  
 Cla1 KHCILLKN-----GFDEVKNTPMRVTPHSCVVFEGKGF-----  
 Rba1 Y-----

|       |                               |
|-------|-------------------------------|
| Mba1  | -----                         |
| Psp2  | -----                         |
| Ybe1  | -LAAAGGKIIP----QGPSQFALQLPPQ  |
| Ype5  | -LTLAGGKITG----SG-NNWQITLPSY  |
| Eco14 | -LRQAGGKIIS----NTGNQITLQLPAW  |
| Sen3  | -LVKNGGKISE----NNG-SWSVTLPHY  |
| Ymo1  | -VINAGGNISD----QGNLAYHITFPPY  |
| Yen2  | -VIKAGGQVIN----QGNLAYYIAMPPY  |
| Pas1  | -LRARGGRIIA----LSNNSYVVQFPNY  |
| Yfr1  | -LMAAGGSIIP----LTMESASVTLPY   |
| Yfr5  | -LVTTGGALTP----LAMESAVVTLPAY  |
| Yps7  | -LMAAGGVLKQ----TSKNGLEITLPEY  |
| Yfr2  | -LIAAGGTLK----GSSNSISITLPPY   |
| Yfr3  | -IVAAGGVVTQ----TSSQNISIKLPPY  |
| Yps4  | -LENAGGSTSP----LTQSSLSVTLPPY  |
| Yps2  | -LIAAGGTLTP----LSTTQFNLVLPY   |
| Esa2  | -----                         |
| Plu1  | -LFQKNGGMIN--I-ESTHGTYIQLPEY  |
| Eco1  | -LRSQGGQIQHSGS-QSAQDYQAILPAY  |
| Pru1  | -LVAAGGHIVQE-----NGKYSVLVLPAY |
| Pal3  | -LVAAGGQVIDEK----NGAYSIIILPTY |
| Eta1  | -LLAAGGKLVREN----EGSWSVILPEH  |
| Sgl1  | -LLAAGGKIVQES----IDNYSIVLPDY  |
| Eco26 | -FIANGGKINEG----LHNYSIILPDY   |

Pmi1 -LNAQGGQIKHHG----GTHYTVILPQY  
Efe5 -FAAAGGKITGS-----GTSWQFTLPAY  
Eco20 -LLAEGGKITGQ-----GSQWQVTLPAY  
Eco25 -LEAAGGKVVT-----GKDILVTLPAY  
Eco15 -LEAAGGKVSTS-----GKDITVTLPGY  
Eco6 -LQSAGGKVAVS-----GKDIQVTIPPY  
Efe2 -LTAAGGVISTA-----DNQVTVTLPAY  
Efe3 -LQSAGGVNTE-----ANQVTVTLPEY  
Pal2 -FLAVGGSISSD-----DQTATLTLPSY  
Csu1 -FIEAGGEITLVSAGKSNAEYTVKLPPEH  
Eco3 SLTPGAQANSAEG-----WTLIMPDW  
Cko1 SLTAGAKADSAEG-----WTIIMPAW  
Sen1 SLTAGTDTRNTEG-----WTIIMPAW  
Eca1 SLTSPANSTSSDG-----WSIIPAW  
Esp2 SLTSPANANSDEG-----WSVIMPAW  
Esa3 SLTPPLDSTSADG-----WTVIMPAW  
Kpn1 SLTPPVDASSPDG-----WSIIMPVW  
Pan1 SLTSPNNNAIDG-----WSVIVPPW  
Eta2 SLTPPPDNSDPQG-----WSIIPAW  
Spr1 SLTPSQNSNDPHG-----WSLIVPQW  
Yin1 SLLATAGATNPQG-----WQITLPAW  
Yin2 LLVPTAGANNPQG-----WQITLPAW  
Yfr4 ALLATAGVDNHQG-----WQITLPAW  
Ymo2 QLLATAGSHNPQG-----WQITLPAW  
Eco10 VMPVIKENTLTEGN---NNHWNLVLPWA  
Eal1 VMPVIKENTLTEGN---NNRWNIIVLPWA  
Sty4 VMPVVKADALTEGN---NNSWNLVLPWA

|       |                               |
|-------|-------------------------------|
| Eco16 | VMPVVKANALTEGN---NNRWNLVLP    |
| Ahy1  | -LSGLSPADTAGQ-----DKRALTLPSL  |
| Sen2  | --ELIAGLQLQGS-----LGSGLILPQL  |
| Efe4  | --ELIGGLQQGN-----VNSGLRLPDL   |
| Bpe1  | TATADASGRFAYTSAGDQPSGVLALRAR  |
| Bav2  | QSRADASGVYRIESRKDQPSGPIRLKAV  |
| Bbr1  | VAQADGSGTYRATSARDMVGPPVRARAT  |
| Bpa2  | SVRANAAGGF EASSAGDMTSGLIRARAT |
| Bav1  | WVRADASGRYTARSGPDMPSGTVRAQAR  |
| Pma1  | -----                         |
| Pma3  | -----                         |
| Pma5  | -----                         |
| Pma4  | -----                         |
| Ssp1  | -----                         |
| Ssp2  | -----                         |
| Plu2  | -----                         |
| Clal  | YITDNSGKVYVQIIRSCPKTDLNAVAG   |
| Rba1  | -----                         |
