# Supplementary material for: The Bacterial Intimins and Invasins: A Large and Novel Family of Secreted Proteins
Source: PubMed Central journal article supplement (PMC3008723; doi:10.1371/journal.pone.0014403), 2010-12-22
Supplement: pone.0014403.s009.pdf [file pone.0014403.s009.pdf]

Yin1 ATGAAVPLVT-GSACPLDASGNPEPCIRLKNTQVEVRDGVNYYVLELVSTVMGTFSLOAD  
Ymo2 -ARTPIELVN-ANQCPLNAAGKVEPCLRIKDDRTEVRDGVNYHILELVSTLAGNFTISSD  
Yfr4 -SGTPVAWVAPGSSCPVDALGLPQPCVQMVQVQTEVRSGINHYVAELVSTQLGTFLVQAD  
Yin2 YSGAVVPLVT-GPTCPTDEDGFPDACLRVTATEVRDGYTYVNSLISNQPGTFIITTD  
: : : \* . \*\* : \* :.\*::: . .\*\*\*.\*:~::~ .\*:~. \*.~ : :\*

Yin1 FNHYGRSNVQIVTF-SNPGGRDNVARAEIVDSA  
Ymo2 MGVYGVSNSTQTFVFNSTISSIENLTGGIFLA--  
Yfr4 LGVYGVTAPOTVSFTSSGP--TLVTRAEIQDPS  
Yin2 LGAYGVTAKTITFTSASPMTVVARAEIRDPA  
:. \*\* : : . \* \* : : . :
