# Supplementary material for: The Bacterial Intimins and Invasins: A Large and Novel Family of Secreted Proteins
Source: PubMed Central journal article supplement (PMC3008723; doi:10.1371/journal.pone.0014403), 2010-12-22
Supplement: pone.0014403.s014.pdf [file pone.0014403.s014.pdf]

Bav2 APSITKVSTDATTGRVTVSGSAEPDVVVTVMFPDGTTEKTVPTNDDGTYRATSDGN-MVSG  
 Bpe1 APTIANVATDATSGRVTAAGMAEPGANVTVNFPDGTTRKTVVAGGDGAYTATSDRD-MVSG  
 Bbr1 VPPTVEVATDSSSGRVTVSGKATPRAKVKVDFPGGTSKTVTADADGRYRATSDGD-VPGG  
 Bpa2 MTPTVRHATDAQTGRVTVMGRTEAGALVTVQFPDGSSTTVRAQNDGGYAATSDD-MVSG  
 Bav1 PQATITSVIPSTLGLTVSGLTQANAQEVYVQFPDGSSTTVNADASGNYTAVSTSKSMPSG  
 Ahy1 GAPTLTAADSNQDDKPEVTGKAEPESTVTTITWPDGSTSTTTADVVDGNYTLEAPTV-QGSG  
 . . . \* : . \* : :\*.\*: .\*. : .\* \* : .\*

Bav2 DILAHATDRAKNRSPDTRYAYADAVAPA  
 Bpe1 DIRVQATDKAGNQSPEATRAYADAVDRT  
 Bbr1 DIVVTQTGMPGAAGKPVRRPYVDTVAPT  
 Bpa2 PIVVSAGDADGNRTPAQQVMYTDTLDKT  
 Bav1 EIMVIATGRSAGVGSAAATQTYTRNPPTA  
 Ahy1 TITATATDKSGNTGPATSVNYIDSTVPG  
 \* . . \*
