# Supplementary material for: The Bacterial Intimins and Invasins: A Large and Novel Family of Secreted Proteins
Source: PubMed Central journal article supplement (PMC3008723; doi:10.1371/journal.pone.0014403), 2010-12-22
Supplement: pone.0014403.s015.pdf [file pone.0014403.s015.pdf]

Efe4 TVNDDNGSIIEWHYVVRVRSKDEWKSLKPENVEYSTHSPGLSFKSLGGEERDGQWIEKVQL  
Sen2 LPAGEEGKVIEWHYVRERSEEEWASLKPRNIKYQSDTPGLSFKALGGTERDGHWVERVLV  
. : \* . : \* \* \* \* \* \* \* \* \* \* \* \* \* \* \* \* \* \* \* \* \* \* \* \* \* \* \* \* \* \* \* \* \* \* \* \* \* \* \* \* \* \* : :

Efe4 VVKDPTARMTLAAMELNISATGPGGTHPVNGTIRMTPVMNL  
Sen2 THVGDDAR----SFKLHIEASGPDDKHPVKGSVLLQAQSDS  
. . \* \* : : \* : \* . \* : \* \* . . \* \* \* : \* : : : . . :
